# Supplementary material for: Molecular Docking Assessment of Cathinones as 5-HT2AR Ligands: Developing of Predictive Structure-Based Bioactive Conformations and Three-Dimensional Structure-Activity Relationships Models for Future Recognition of Abuse Drugs
Source: MDPI journal article supplement (doi:10.3390/molecules28176236), 2023-08-24
Supplement: s1 [file s1]

# Molecular Docking Assessment of Cathinones as 5-HT<sub>2A</sub>R Ligands: Developing of Predictive Structure-Based Bioactive Conformations and Three-Dimensional Structure-Activity Relationships Models for Future Recognition of Abuse Drugs

## Contents

**Table S1.** Onsets and durations of actions of SCs 5-HT<sub>2A</sub>R ligands compiling the TR.

**Table S2.** Structure-based alignment assessment of 5-HT<sub>2A</sub>R ligands.

**Table S3.** Structure-based alignment assessment of 5-HT<sub>2B</sub>R ligands.

**Table S4.** Best Open3DQSAR Models' (OH2 model at PC5) Predictive Abilities for TR.

**Table S5.** Best Open3DQSAR Models' (OH2 model at PC5) Predictive Abilities for TS.

**Table S6.** Best Open3DQSAR Models' (OH2 model at PC5) Predictive Abilities for TS<sub>CRY</sub>.

**Figure S1.** The structure-based alignment within 5-HT<sub>2A</sub>R-DPPC and OH2 probe-based *PLS-coefficients* (positive steric coefficients presented in green, negative steric coefficients depicted in yellow, positive electrostatic coefficients portrayed in red, negative electrostatic coefficients displayed in blue) for **23** (a, b); **11** (c, d); **19** (e, f). For the clarity of presentation, DPPC was omitted.

**Figure S2.** The structure-based alignment within 5-HT<sub>2A</sub>R-DPPC and OH2 probe-based *PLS-coefficients* (positive steric coefficients presented in green, negative steric coefficients depicted in yellow, positive electrostatic coefficients portrayed in red, negative electrostatic coefficients displayed in blue) for **24** (a, b); **5** (c, d); **20** (e, f). For the clarity of presentation, DPPC was omitted.

**Figure S3.** The structure-based alignment within 5-HT<sub>2A</sub>R-DPPC and OH2 probe-based *PLS-coefficients* (positive steric coefficients presented in green, negative steric coefficients depicted in yellow, positive electrostatic coefficients portrayed in red, negative electrostatic coefficients displayed in blue) for **12** (a, b); **21** (c, d); **6** (e, f). For the clarity of presentation, DPPC was omitted.

**Figure S4.** The structure-based alignment within 5-HT<sub>2A</sub>R-DPPC and OH2 probe-based *PLS-coefficients* (positive steric coefficients presented in green, negative steric coefficients depicted in yellow, positive electrostatic coefficients portrayed in red, negative electrostatic coefficients displayed in blue) for **7** (a, b); **14** (c, d); **8** (e, f). For the clarity of presentation, DPPC was omitted.

**Figure S5.** The structure-based alignment within 5-HT<sub>2A</sub>R-DPPC and OH2 probe-based *PLS-coefficients* (positive steric coefficients presented in green, negative steric coefficients depicted in yellow, positive electrostatic coefficients portrayed in red, negative electrostatic coefficients displayed in blue) for **3** (a, b); **22** (c, d); **10** (e, f). For the clarity of presentation, DPPC was omitted.

**Figure S6.** The structure-based alignment within 5-HT<sub>2A</sub>R-DPPC and OH2 probe-based *PLS-coefficients* (positive steric coefficients presented in green, negative steric coefficients depicted in yellow, positive electrostatic coefficients portrayed in red, negative electrostatic coefficients displayed in blue) for **15** (a, b); **16** (c, d); **13** (e, f). For the clarity of presentation, DPPC was omitted.

**Figure S7.** The structure-based alignment within 5-HT<sub>2A</sub>R-DPPC and OH2 probe-based *PLS-coefficients* (positive steric coefficients presented in green, negative steric coefficients depicted in yellow, positive electrostatic coefficients portrayed in red, negative electrostatic coefficients displayed in blue) for **28** (a, b); **29** (c, d); **30** (e, f). For the clarity of presentation, DPPC was omitted.

**Figure S8.** The structure-based alignment within 5-HT<sub>2A</sub>R-DPPC and OH2 probe-based *PLS-coefficients* (positive steric coefficients presented in green, negative steric coefficients depicted in

yellow, positive electrostatic coefficients portrayed in red, negative electrostatic coefficients displayed in blue) for **31** (a, b); **32** (c, d); **33** (e, f). For the clarity of presentation, DPPC was omitted.

**Figure 9.** The structure-based alignment within 5-HT<sub>2A</sub>R-DPPC and OH2 probe-based *PLS-coefficients* (positive steric coefficients presented in green, negative steric coefficients depicted in yellow, positive electrostatic coefficients portrayed in red, negative electrostatic coefficients displayed in blue) for **34** (a, b); **35** (c, d); **36** (e, f). For the clarity of presentation, DPPC was omitted.

**Figure S10.** The structure-based alignment within 5-HT<sub>2A</sub>R-DPPC and OH2 probe-based *PLS-coefficients* (positive steric coefficients presented in green, negative steric coefficients depicted in yellow, positive electrostatic coefficients portrayed in red, negative electrostatic coefficients displayed in blue) for **37** (a, b); **38** (c, d); **39** (e, f). For the clarity of presentation, DPPC was omitted.

**Figure S11.** The structure-based alignment within 5-HT<sub>2A</sub>R-DPPC and OH2 probe-based *PLS-coefficients* (positive steric coefficients presented in green, negative steric coefficients depicted in yellow, positive electrostatic coefficients portrayed in red, negative electrostatic coefficients displayed in blue) for **40** (a, b); **41** (c, d); **42** (e, f). For the clarity of presentation, DPPC was omitted.

**Figure S12.** The structure-based alignment within 5-HT<sub>2A</sub>R-DPPC and OH2 probe-based *PLS-coefficients* (positive steric coefficients presented in green, negative steric coefficients depicted in yellow, positive electrostatic coefficients portrayed in red, negative electrostatic coefficients displayed in blue) for **43** (a, b); **44** (c, d). For the clarity of presentation, DPPC was omitted.

**Figure S13.** The structure-based alignment within 5-HT<sub>2A</sub>R-DPPC and OH2 probe-based *PLS-coefficients* (positive steric coefficients presented in green, negative steric coefficients depicted in yellow, positive electrostatic coefficients portrayed in red, negative electrostatic coefficients displayed in blue) for **45** (a, b); **46** (c, d). For the clarity of presentation, DPPC was omitted.

**Figure S14.** The structure-based alignment within 5-HT<sub>2A</sub>R-DPPC and OH2 probe-based *PLS-coefficients* (positive steric coefficients presented in green, negative steric coefficients depicted in yellow, positive electrostatic coefficients portrayed in red, negative electrostatic coefficients displayed in blue) for **6WGT** (a, b); **7WC6** (c, d); **7WC7** (e, f). For the clarity of presentation, DPPC was omitted.

**Figure S15.** The structure-based alignment within 5-HT<sub>2A</sub>R-DPPC and OH2 probe-based *PLS-coefficients* (positive steric coefficients presented in green, negative steric coefficients depicted in yellow, positive electrostatic coefficients portrayed in red, negative electrostatic coefficients displayed in blue) for **6A93** (a, b); **7VOD** (c, d); **7VOE** (e, f). For the clarity of presentation, DPPC was omitted.

**Figure S16.** The structure-based alignment within 5-HT<sub>2A</sub>R-DPPC and OH2 probe-based *PLS-coefficients* (positive steric coefficients presented in green, negative steric coefficients depicted in yellow, positive electrostatic coefficients portrayed in red, negative electrostatic coefficients displayed in blue) for **7WC4** (a, b); **7RAN** (c, d); **7WC5** (e, f). For the clarity of presentation, DPPC was omitted.

**Figure S17.** The structure-based alignment within 5-HT<sub>2A</sub>R-DPPC and OH2 probe-based *PLS-coefficients* (positive steric coefficients presented in green, negative steric coefficients depicted in yellow, positive electrostatic coefficients portrayed in red, negative electrostatic coefficients displayed in blue) for **7WC9** (a, b); **7WC8** (c, d). For the clarity of presentation, DPPC was omitted.

**Table S1.** Onsets and durations of actions of SCs 5-HT<sub>2A</sub>R ligands compiling the TR.

| Name<br>(Number)                                            | OA               | DA           | Ref  | Name<br>(Number)                      | OA                                                                                    | DA                                                                                    | Ref  |
|-------------------------------------------------------------|------------------|--------------|------|---------------------------------------|---------------------------------------------------------------------------------------|---------------------------------------------------------------------------------------|------|
| <i>Cathinone and its derivatives</i>                        |                  |              |      | <b>Naphyrone<br/>(13)</b>             | 30 min                                                                                | NA                                                                                    | [34] |
| <b>Cathinone<br/>(1)</b>                                    | 15-30<br>minutes | 2-3<br>hours | [34] | <b>MDPV<br/>(14)</b>                  | intranasal<br>administration:<br>30 minutes<br>intravenous<br>injection: 10-15<br>min | intranasal<br>administration:<br>2-3 hours<br>intravenous<br>injection: 30<br>minutes | [34] |
| <b>Flephedrone<br/>(2)</b>                                  | NA               | NA           | [34] | <b>Pyrovalerone<br/>(15)</b>          | NA                                                                                    | NA                                                                                    | [34] |
| <b>Mephedrone<br/>(3)</b>                                   | 10-45<br>min     | 2-4<br>hours | [34] | <b>MDPPP<br/>(16)</b>                 | NA                                                                                    | NA                                                                                    | [21] |
| <b>Methcathinone<br/>(4)</b>                                | 5 min            | 60-90<br>min | [34] | <i>Benzo[d][1,3]dioxole-based SCs</i> |                                                                                       |                                                                                       |      |
| <b>4-<br/>Bromomethcathinone<br/>(5)</b>                    | NA               | NA           | [21] | <b>MDBD<br/>(17)</b>                  | NA                                                                                    | NA                                                                                    | [34] |
| <b>3-<br/>Bromomethcathinone<br/>(6)</b>                    | NA               | NA           | [21] | <b>MDMA<br/>(18)</b>                  | 30-45 min                                                                             | 4-6 hours                                                                             | [34] |
| <b>2-<br/>Fluoromethcathinone<br/>(7)</b>                   | NA               | NA           | [21] | <b>Butylone<br/>(19)</b>              | 15-60 min                                                                             | 3-5 hours                                                                             | [34] |
| <b>2-<br/>(Trifluoromethoxy)-<br/>methcathinone<br/>(8)</b> | NA               | NA           | [21] | <b>Ethylone<br/>(20)</b>              | 15 - 45 min                                                                           | 2 - 4 hours                                                                           | [34] |
| <i>Pyrovalerone-based SCs</i>                               |                  |              |      | <b>MDEA<br/>(21)</b>                  | 15-30 min                                                                             | <i>Pyrovalerone-<br/>based SCs</i>                                                    |      |
| <b><math>\alpha</math>-PPP<br/>(9)</b>                      | NA               | NA           | [21] | <b>Methylone<br/>(22)</b>             | 15-45 minutes                                                                         | 2.5-4 hours                                                                           | [34] |
| <b>4-Methyl-<math>\alpha</math>-PPP<br/>(10)</b>            | NA               | NA           | [21] | <i>SCs' precursors</i>                |                                                                                       |                                                                                       |      |
| <b>4-Bromo-<math>\alpha</math>-PPP<br/>(11)</b>             | NA               | NA           | [21] | <b>Amphetamine<br/>(23)</b>           | 30-45 min                                                                             | 6-8 hours                                                                             | [34] |
| <b>3-Bromo-<math>\alpha</math>-PPP<br/>(12)</b>             | NA               | NA           | [21] | <b>Methamphetamine<br/>(24)</b>       | 15-45 minutes                                                                         | 8-12 hours                                                                            | [34] |

<sup>a</sup>Onset of action; <sup>b</sup>Duration of action; <sup>c</sup>Not available.

**Table S2.** Structure-based alignment assessment of 5-HT<sub>2A</sub>R ligands.

| Code            | AutoDock                                              | Vina   | SMINA  |         |        | DOCK   |         | PLANTS |        | Ref  |
|-----------------|-------------------------------------------------------|--------|--------|---------|--------|--------|---------|--------|--------|------|
| SF <sup>a</sup> |                                                       |        | vina   | vinardo | ad4    |        | chemplp | plp    | plp95  |      |
| EC <sup>b</sup> | <b>Experimental Conformation Re-Docking (ECDR)</b>    |        |        |         |        |        |         |        |        |      |
| 6A93            | 2.321 <sup>c</sup>                                    | 1.785  | 1.436  | 1.673   | 2.624  | 2.321  | 1.153   | 1.923  | 1.457  | [16] |
| 6A94            | 1.456                                                 | 1.432  | 0.981  | 1.975   | 1.524  | 1.456  | 1.465   | 1.573  | 1.451  | [16] |
| 6WGT            | 2.345                                                 | 1.983  | 1.243  | 1.834   | 1.987  | 2.123  | 2.142   | 1.983  | 2.226  | [56] |
| 6WH4            | 2.563                                                 | 1.783  | 1.783  | 1.832   | 2.552  | 2.463  | 2.453   | 2.672  | 2.823  | [55] |
| 6WHA            | 2.435                                                 | 2.831  | 2.432  | 2.443   | 2.638  | 2.124  | 2.143   | 2.562  | 2.134  | [55] |
| 7RAN            | 2.641                                                 | 1.964  | 2.162  | 1.847   | 1.487  | 2.362  | 1.965   | 1.257  | 2.364  | [63] |
| 7VOD            | 1.951                                                 | 2.812  | 1.984  | 1.954   | 1.632  | 1.964  | 1.517   | 1.639  | 1.527  | [64] |
| 7VOE            | 2.632                                                 | 1.924  | 2.226  | 2.624   | 2.247  | 2.481  | 2.624   | 2.514  | 1.987  | [64] |
| 7WC4            | 3.624                                                 | 1.874  | 1.962  | 2.552   | 1.954  | 3.624  | 2.614   | 1.697  | 2.156  | [61] |
| 7WC5            | 3.228                                                 | 2.632  | 1.625  | 2.326   | 2.658  | 3.514  | 1.847   | 1.992  | 2.634  | [61] |
| 7WC6            | 2.984                                                 | 1.874  | 2.251  | 1.847   | 1.421  | 3.265  | 1.965   | 2.624  | 1.524  | [61] |
| 7WC7            | 2.632                                                 | 1.695  | 1.984  | 2.625   | 2.624  | 2.659  | 1.748   | 2.748  | 1.695  | [61] |
| 7WC8            | 3.624                                                 | 1.874  | 2.625  | 2.657   | 1.847  | 3.258  | 2.632   | 1.936  | 1.854  | [61] |
| 7WC9            | 2.998                                                 | 1.994  | 1.889  | 1.842   | 2.624  | 3.627  | 1.951   | 1.874  | 1.958  | [61] |
| DA <sup>d</sup> | 42.85%                                                | 89.28% | 75.00% | 78.57%  | 77.14% | 39.28% | 78.57%  | 82.14% | 78.57% |      |
|                 | <b>Randomized Conformation Re-Docking (RCRD)</b>      |        |        |         |        |        |         |        |        |      |
| 6A93            | 2.431                                                 | 1.895  | 1.964  | 1.731   | 1.847  | 3.452  | 1.478   | 1.104  | 1.673  | [16] |
| 6A94            | 1.895                                                 | 1.674  | 1.874  | 1.573   | 2.654  | 2.663  | 1.453   | 1.653  | 1.734  | [16] |
| 6WGT            | 2.342                                                 | 2.016  | 1.342  | 1.994   | 1.548  | 2.461  | 2.432   | 2.342  | 2.445  | [16] |
| 6WH4            | 2.967                                                 | 1.994  | 1.907  | 2.016   | 2.214  | 3.673  | 2.973   | 2.992  | 3.435  | [55] |
| 6WHA            | 3.123                                                 | 2.932  | 2.695  | 2.774   | 2.418  | 2.452  | 2.645   | 2.234  | 2.893  | [55] |
| 7RAN            | 3.415                                                 | 1.965  | 1.984  | 1.594   | 1.987  | 2.542  | 1.658   | 1.654  | 1.897  | [63] |
| 7VOD            | 2.967                                                 | 1.864  | 2.564  | 2.654   | 1.574  | 2.641  | 1.777   | 1.874  | 1.574  | [64] |
| 7VOE            | 3.221                                                 | 1.978  | 2.639  | 3.215   | 2.362  | 2.587  | 1.749   | 2.625  | 2.517  | [64] |
| 7WC4            | 3.264                                                 | 2.154  | 2.478  | 2.514   | 1.547  | 2.624  | 2.514   | 1.787  | 2.657  | [61] |
| 7WC5            | 2.984                                                 | 1.967  | 1.987  | 1.548   | 1.259  | 3.514  | 1.547   | 2.565  | 1.547  | [61] |
| 7WC6            | 3.624                                                 | 1.784  | 1.874  | 2.147   | 2.254  | 1.625  | 1.638   | 2.565  | 2.699  | [61] |
| 7WC7            | 3.654                                                 | 2.634  | 2.968  | 1.984   | 2.635  | 2.514  | 2.641   | 1.894  | 2.514  | [61] |
| 7WC8            | 2.471                                                 | 1.894  | 2.987  | 1.874   | 2.514  | 2.657  | 2.848   | 1.847  | 1.784  | [61] |
| 7WC9            | 2.987                                                 | 2.624  | 2.697  | 1.666   | 2.641  | 3.541  | 2.614   | 1.594  | 1.984  | [61] |
| DA              | 32.14%                                                | 82.14% | 75.00% | 74.28%  | 71.43% | 39.28% | 75.00%  | 78.57% | 71.43% |      |
|                 | <b>Experimental Conformation Cross-Docking (ECCD)</b> |        |        |         |        |        |         |        |        |      |
| 6A93            | 2.563                                                 | 1.953  | 2.321  | 1.863   | 2.415  | 2.431  | 2.541   | 2.564  | 2.451  | [16] |
| 6A94            | 2.553                                                 | 2.483  | 2.973  | 2.653   | 2.639  | 3.543  | 2.314   | 2.774  | 1.996  | [16] |
| 6WGT            | 2.662                                                 | 2.633  | 1.893  | 2.074   | 1.964  | 2.641  | 2.784   | 2.745  | 2.781  | [16] |
| 6WH4            | 2.931                                                 | 1.973  | 1.963  | 1.943   | 2.984  | 2.896  | 2.741   | 2.553  | 2.963  | [55] |
| 6WHA            | 3.451                                                 | 3.032  | 2.853  | 2.684   | 2.418  | 2.523  | 2.984   | 2.785  | 2.334  | [55] |
| 7RAN            | 2.148                                                 | 1.987  | 1.847  | 2.964   | 2.954  | 2.965  | 2.641   | 2.657  | 2.651  | [63] |

|             |        |        |        |        |        |        |        |        |        |      |
|-------------|--------|--------|--------|--------|--------|--------|--------|--------|--------|------|
| <b>7VOD</b> | 3.362  | 2.514  | 1.667  | 1.897  | 1.987  | 2.635  | 1.974  | 2.874  | 2.418  | [64] |
| <b>7VOE</b> | 2.547  | 1.874  | 1.984  | 2.364  | 3.165  | 2.558  | 2.419  | 2.457  | 2.984  | [64] |
| <b>7WC4</b> | 3.457  | 2.552  | 2.968  | 2.226  | 1.984  | 3.695  | 2.996  | 1.487  | 1.897  | [61] |
| <b>7WC5</b> | 2.547  | 2.639  | 2.687  | 1.987  | 1.874  | 2.487  | 2.874  | 2.695  | 2.635  | [61] |
| <b>7WC6</b> | 3.248  | 1.874  | 1.847  | 1.984  | 2.657  | 2.965  | 1.965  | 1.547  | 1.987  | [61] |
| <b>7WC7</b> | 3.451  | 1.698  | 2.625  | 2.635  | 2.996  | 2.952  | 2.624  | 2.652  | 2.635  | [61] |
| <b>7WC8</b> | 2.597  | 1.587  | 2.587  | 1.897  | 2.874  | 3.147  | 3.647  | 3.697  | 2.987  | [61] |
| <b>7WC9</b> | 2.544  | 1.848  | 2.647  | 2.631  | 2.985  | 3.894  | 3.447  | 4.235  | 2.634  | [61] |
| <b>DA</b>   | 28.57% | 75.00% | 71.24% | 71.24% | 60.72% | 35.71% | 50.00% | 50.00% | 57.14% |      |

<sup>a</sup>Scoring function; <sup>b</sup>Experimental conformation; <sup>c</sup>Root-Mean-Square-Deviation measured between the heavy atoms of the ligand's experimental and the ligand's re-/cross-aligned conformation; <sup>d</sup>Docking accuracy.

**Table S3.** Structure-based alignment assessment of 5-HT<sub>2B</sub>R ligands.

| Code            | AutoDock                                              | Vina    | SMINA   |         |        | DOCK   | PLANTS  |        |        | Ref  |
|-----------------|-------------------------------------------------------|---------|---------|---------|--------|--------|---------|--------|--------|------|
| SF <sup>a</sup> |                                                       |         | vina    | vinardo | ad4    |        | chemplp | plp    | plp95  |      |
| EC <sup>b</sup> | <b>Experimental Conformation Re-Docking (ECDR)</b>    |         |         |         |        |        |         |        |        |      |
| 4IB4            | 2.542                                                 | 1.238   | 1.431   | 1.563   | 2.634  | 4.312  | 3.342   | 2.213  | 3.431  | [59] |
| 4NC3            | 3.886 <sup>c</sup>                                    | 1.101   | 1.235   | 1.243   | 2.625  | 3.453  | 2.864   | 2.223  | 2.835  | [59] |
| 5TUD            | 2.145                                                 | 1.965   | 1.968   | 1.625   | 1.625  | 2.652  | 1.265   | 1.964  | 1.965  | [57] |
| 5TVN            | 2.563                                                 | 1.214   | 1.452   | 1.896   | 1.564  | 2.412  | 1.563   | 2.233  | 3.231  | [56] |
| 6DRX            | 1.432                                                 | 1.546   | 1.238   | 1.784   | 1.874  | 1.643  | 2.563   | 2.324  | 2.322  | [60] |
| 6DRY            | 2.541                                                 | 1.426   | 1.316   | 1.353   | 1.236  | 1.321  | 1.356   | 1.452  | 2.112  | [60] |
| 6DRZ            | 1.735                                                 | 1.745   | 1.452   | 1.584   | 2.624  | 1.678  | 2.346   | 2.467  | 1.254  | [60] |
| 6DS0            | 1.562                                                 | 1.784   | 1.467   | 1.336   | 2.415  | 1.654  | 1.922   | 2.463  | 2.241  | [60] |
| 7SQR            | 2.642                                                 | 1.524   | 1.625   | 1.458   | 1.632  | 1.652  | 1.625   | 1.847  | 1.842  | [62] |
| 7SRR            | 2.614                                                 | 1.965   | 1.965   | 1.625   | 1.528  | 3.265  | 2.517   | 1.658  | 1.748  | [62] |
| 7SRS            | 2.642                                                 | 1.897   | 1.457   | 1.254   | 1.985  | 2.514  | 1.695   | 1.695  | 1.666  | [62] |
| DA <sup>d</sup> | 64.28%                                                | 100.00% | 100.00% | 100.00% | 81.81% | 59.09% | 72.72%  | 72.72% | 69.64% |      |
|                 | <b>Randomized Conformation Re-Docking (RCRD)</b>      |         |         |         |        |        |         |        |        |      |
| 4NC3            | 4.436                                                 | 1.998   | 2.431   | 2.443   | 1.625  | 4.312  | 2.952   | 2.474  | 2.231  | [59] |
| 4IB4            | 2.675                                                 | 2.264   | 2.435   | 2.453   | 2.445  | 4.774  | 3.424   | 2.321  | 2.452  | [76] |
| 5TUD            | 2.658                                                 | 1.284   | 1.958   | 1.632   | 2.639  | 2.642  | 1.542   | 1.254  | 2.651  | [57] |
| 5TVN            | 3.431                                                 | 1.388   | 1.874   | 1.964   | 2.457  | 3.421  | 1.873   | 2.654  | 3.653  | [56] |
| 6DRX            | 1.763                                                 | 1.974   | 2.374   | 1.904   | 1.635  | 1.214  | 2.342   | 2.436  | 2.563  | [60] |
| 6DRY            | 2.673                                                 | 2.462   | 2.332   | 2.431   | 1.457  | 1.783  | 1.352   | 1.742  | 2.311  | [60] |
| 6DRZ            | 2.544                                                 | 1.896   | 2.184   | 1.984   | 2.635  | 2.153  | 2.673   | 3.342  | 2.431  | [60] |
| 6DS0            | 1.573                                                 | 1.783   | 1.974   | 2.203   | 2.547  | 2.142  | 2.374   | 2.835  | 2.341  | [60] |
| 7SQR            | 2.641                                                 | 1.965   | 2.642   | 2.458   | 2.636  | 2.148  | 1.623   | 1.625  | 1.598  | [62] |
| 7SRS            | 2.524                                                 | 1.784   | 2.437   | 1.451   | 1.598  | 1.845  | 2.526   | 2.545  | 1.784  | [62] |
| 7SRR            | 2.559                                                 | 2.624   | 1.663   | 2.641   | 2.654  | 2.658  | 2.568   | 2.645  | 1.658  | [62] |
| DA              | 50.00%                                                | 86.36%  | 68.18%  | 72.73%  | 68.18% | 50.00% | 63.64%  | 59.09% | 54.55% |      |
|                 | <b>Experimental Conformation Cross-Docking (ECCD)</b> |         |         |         |        |        |         |        |        |      |
| 4NC3            | 4.432                                                 | 2.434   | 2.325   | 2.784   | 3.116  | 3.532  | 3.012   | 3.714  | 3.531  | [59] |
| 4IB4            | 2.778                                                 | 2.874   | 1.924   | 2.984   | 2.453  | 4.321  | 4.321   | 2.777  | 4.683  | [59] |
| 5TUD            | 3.645                                                 | 1.965   | 2.514   | 1.795   | 2.342  | 2.624  | 2.614   | 2.745  | 3.014  | [57] |
| 5TVN            | 4.321                                                 | 1.984   | 1.963   | 1.943   | 1.324  | 4.352  | 2.346   | 2.796  | 4.546  | [56] |
| 6DRX            | 1.937                                                 | 2.435   | 2.424   | 2.435   | 1.621  | 2.563  | 2.896   | 3.332  | 3.451  | [60] |
| 6DRY            | 2.456                                                 | 1.974   | 2.894   | 2.984   | 2.434  | 2.523  | 2.324   | 2.431  | 2.345  | [60] |
| 6DRZ            | 2.563                                                 | 2.332   | 2.425   | 2.452   | 2.002  | 2.452  | 2.346   | 2.467  | 1.254  | [60] |
| 6DS0            | 1.784                                                 | 1.027   | 2.436   | 2.894   | 2.784  | 2.451  | 2.438   | 2.996  | 2.451  | [60] |
| 7SQR            | 2.654                                                 | 2.515   | 2.415   | 2.514   | 2.983  | 2.624  | 3.265   | 2.963  | 2.584  | [62] |
| 7SRS            | 3.669                                                 | 1.458   | 2.481   | 1.894   | 2.435  | 3.214  | 2.514   | 2.624  | 2.958  | [62] |
| 7SRR            | 3.337                                                 | 2.147   | 2.659   | 2.584   | 3.113  | 4.621  | 2.514   | 3.624  | 2.774  | [62] |

|           |        |        |        |        |        |        |        |        |        |
|-----------|--------|--------|--------|--------|--------|--------|--------|--------|--------|
| <b>DA</b> | 36.37% | 72.73% | 63.64% | 54.55% | 50.00% | 27.27% | 45.45% | 36.36% | 31.82% |
|-----------|--------|--------|--------|--------|--------|--------|--------|--------|--------|

<sup>a</sup>Scoring function; <sup>b</sup>Experimental conformation; <sup>c</sup>Root-Mean-Square-Deviation measured between the heavy atoms of the ligand's experimental and the ligand's re-/cross-aligned conformation; <sup>d</sup>Docking accuracy.

**Table S4.** Best Open3DQSAR Models' (OH2 model at PC5) Predictive Abilities for TR.

| Compound | pK <sub>i</sub> | Field/Cross-validation |                  |                  |                  |                  |                  |      |      |                  |
|----------|-----------------|------------------------|------------------|------------------|------------------|------------------|------------------|------|------|------------------|
|          |                 | STE                    |                  |                  | ELE              |                  |                  | BOTH |      |                  |
|          |                 | LOO <sup>b</sup>       | LSO <sup>c</sup> | AEP <sup>d</sup> | LOO <sup>b</sup> | LSO <sup>c</sup> | AEP <sup>d</sup> | LOO  | LSO  | AEP <sup>d</sup> |
| 1        | 6.00            | 5.12                   | 4.62             | 1.13             | 5.65             | 5.24             | 0.56             | 5.53 | 4.95 | 0.76             |
| 2        | 6.00            | 4.73                   | 5.45             | 0.91             | 4.86             | 5.14             | 1.00             | 4.60 | 5.13 | 1.14             |
| 3        | 5.68            | 4.78                   | 5.24             | 0.67             | 4.49             | 4.97             | 0.95             | 4.64 | 4.94 | 0.89             |
| 4        | 5.23            | 5.12                   | 4.23             | 0.73             | 4.99             | 4.35             | 0.56             | 5.03 | 4.78 | 0.33             |
| 5        | 5.20            | 5.34                   | 6.12             | 0.78             | 5.72             | 5.36             | 0.34             | 5.49 | 5.12 | 0.19             |
| 6        | 5.00            | 5.67                   | 4.75             | 0.46             | 4.92             | 4.57             | 0.26             | 5.08 | 4.36 | 0.36             |
| 7        | 5.00            | 5.18                   | 5.12             | 0.40             | 4.96             | 4.46             | 0.29             | 4.94 | 5.35 | 0.21             |
| 8        | 5.00            | 5.35                   | 4.45             | 0.45             | 4.96             | 5.13             | 0.09             | 4.94 | 4.24 | 0.41             |
| 9        | 5.60            | 5.12                   | 4.33             | 0.88             | 5.50             | 5.18             | 0.26             | 5.35 | 4.95 | 0.45             |
| 10       | 5.50            | 5.12                   | 6.71             | 0.80             | 5.43             | 5.56             | 0.06             | 5.46 | 5.71 | 0.13             |
| 11       | 5.40            | 4.91                   | 4.35             | 0.87             | 4.91             | 5.13             | 0.38             | 4.99 | 4.76 | 0.53             |
| 12       | 5.00            | 4.96                   | 5.57             | 0.63             | 4.91             | 5.46             | 0.28             | 5.04 | 5.21 | 0.13             |
| 13       | 4.96            | 4.72                   | 4.86             | 0.37             | 4.78             | 4.93             | 0.11             | 4.94 | 5.12 | 0.09             |
| 14       | 4.88            | 4.94                   | 5.63             | 0.61             | 4.86             | 5.11             | 0.13             | 4.76 | 4.99 | 0.12             |
| 15       | 4.88            | 4.87                   | 5.35             | 0.61             | 4.87             | 4.45             | 0.22             | 4.98 | 5.55 | 0.39             |
| 16       | 4.20            | 5.42                   | 5.52             | 1.27             | 5.06             | 5.35             | 1.01             | 5.01 | 4.77 | 0.69             |
| 17       | 5.20            | 5.67                   | 5.32             | 0.45             | 5.73             | 5.13             | 0.30             | 6.02 | 5.67 | 0.65             |
| 18       | 5.11            | 4.84                   | 5.31             | 0.54             | 5.06             | 4.78             | 0.19             | 4.86 | 5.02 | 0.17             |
| 19       | 4.88            | 4.61                   | 5.34             | 0.37             | 4.85             | 4.36             | 0.28             | 4.88 | 5.12 | 0.12             |
| 20       | 4.88            | 5.01                   | 6.42             | 0.99             | 5.11             | 5.26             | 0.31             | 4.95 | 5.13 | 0.16             |
| 21       | 4.88            | 5.52                   | 5.35             | 0.56             | 5.26             | 5.79             | 0.65             | 5.15 | 4.97 | 0.18             |
| 22       | 4.88            | 5.52                   | 5.69             | 0.73             | 5.05             | 5.27             | 0.28             | 5.16 | 4.78 | 0.19             |
| 23       | 4.88            | 5.54                   | 5.24             | 0.51             | 4.92             | 4.35             | 0.29             | 5.04 | 5.36 | 0.32             |
| 24       | 4.88            | 5.03                   | 5.66             | 0.47             | 5.44             | 5.14             | 0.41             | 5.42 | 5.12 | 0.39             |

<sup>a</sup>Predictions were obtained with FFD optimized models. <sup>b</sup>Leave-one-out cross-validation. <sup>c</sup>Leave-some-out cross-validation with 5-random-groups-out. <sup>d</sup>The absolute error of prediction of LOO and LSO cross-validations.

**Table S5.** Best Open3DQSAR Models' (OH2 model at PC5) Predictive Abilities for TS.

| Compound | pK <sub>i</sub> | Field/Cross-validation |                  |                  |                  |                  |                  |      |      |                  |
|----------|-----------------|------------------------|------------------|------------------|------------------|------------------|------------------|------|------|------------------|
|          |                 | STE                    |                  |                  | ELE              |                  |                  | BOTH |      |                  |
|          |                 | LOO <sup>b</sup>       | LSO <sup>c</sup> | AEP <sup>d</sup> | LOO <sup>b</sup> | LSO <sup>c</sup> | AEP <sup>d</sup> | LOO  | LSO  | AEP <sup>d</sup> |
| 25       | 8.57            | 6.87                   | 6.12             | 2.08             | 6.63             | 6.22             | 2.15             | 8.43 | 5.12 | 1.80             |
| 26       | 7.20            | 6.34                   | 6.26             | 0.90             | 6.34             | 6.12             | 0.97             | 7.36 | 6.61 | 0.38             |
| 27       | 8.39            | 8.05                   | 7.62             | 0.56             | 7.92             | 7.41             | 0.73             | 7.76 | 8.24 | 0.39             |
| 28       | 8.22            | 7.87                   | 7.31             | 0.63             | 7.66             | 7.24             | 0.77             | 7.43 | 8.07 | 0.47             |
| 29       | 9.67            | 7.12                   | 6.12             | 3.05             | 7.12             | 6.55             | 2.84             | 7.84 | 7.43 | 2.04             |
| 30       | 6.95            | 6.14                   | 6.07             | 0.85             | 6.05             | 5.43             | 1.21             | 7.22 | 6.27 | 0.48             |
| 31       | 7.54            | 7.95                   | 7.12             | 0.42             | 7.13             | 6.06             | 0.95             | 6.51 | 5.75 | 1.41             |
| 32       | 7.34            | 8.13                   | 7.56             | 0.51             | 6.66             | 6.41             | 0.81             | 6.97 | 6.37 | 0.67             |
| 33       | 8.15            | 7.32                   | 7.23             | 0.88             | 7.46             | 7.23             | 0.81             | 8.12 | 7.99 | 0.10             |
| 34       | 7.78            | 8.31                   | 7.56             | 0.38             | 7.13             | 6.87             | 0.78             | 7.24 | 7.61 | 0.36             |
| 35       | 6.20            | 5.54                   | 5.42             | 0.72             | 4.76             | 4.34             | 1.65             | 6.39 | 4.13 | 1.13             |
| 36       | 6.82            | 7.53                   | 7.18             | 0.54             | 6.31             | 5.94             | 0.70             | 6.23 | 6.65 | 0.38             |
| 37       | 8.88            | 6.14                   | 6.99             | 2.32             | 7.36             | 7.31             | 1.55             | 7.68 | 7.94 | 1.07             |
| 38       | 6.81            | 5.98                   | 5.83             | 0.90             | 4.36             | 4.02             | 2.62             | 5.13 | 4.54 | 1.98             |
| 39       | 7.44            | 6.57                   | 6.51             | 0.90             | 7.14             | 6.71             | 0.52             | 7.22 | 7.38 | 0.14             |
| 40       | 9.69            | 8.74                   | 8.88             | 0.88             | 8.76             | 8.32             | 1.15             | 8.76 | 6.94 | 1.84             |
| 41       | 6.03            | 5.68                   | 5.53             | 0.43             | 5.85             | 5.17             | 0.52             | 5.26 | 6.14 | 0.44             |
| 42       | 8.52            | 8.63                   | 8.34             | 0.15             | 7.76             | 7.61             | 0.84             | 8.12 | 6.33 | 1.30             |
| 43       | 5.00            | 4.06                   | 3.99             | 0.98             | 4.21             | 4.00             | 0.90             | 4.04 | 3.36 | 1.30             |
| 44       | 5.64            | 4.79                   | 4.71             | 0.89             | 5.21             | 4.79             | 0.64             | 5.14 | 3.96 | 1.09             |
| 45       | 6.07            | 5.13                   | 4.87             | 1.07             | 4.07             | 3.22             | 2.43             | 5.67 | 4.26 | 1.11             |
| 46       | 7.40            | 6.52                   | 6.46             | 0.91             | 6.54             | 6.51             | 0.88             | 6.65 | 5.06 | 1.55             |

<sup>a</sup>Predictions were obtained with FFD-optimized models. <sup>b</sup>Leave-one-out cross-validation. <sup>c</sup>Leave-some-out cross-validation with 5-random-groups-out. <sup>d</sup>The absolute error of prediction of LOO and LSO cross-validations.



**Table S6.** Best Open3DQSAR Models' (OH2 model at PC5) Predictive Abilities for TS<sub>CRY</sub>.

| Compound    | pK <sub>i</sub> | Field/Cross-validation |                  |                  |                  |                  |                  |       |       |                  |
|-------------|-----------------|------------------------|------------------|------------------|------------------|------------------|------------------|-------|-------|------------------|
|             |                 | STE                    |                  |                  | ELE              |                  |                  | BOTH  |       |                  |
|             |                 | LOO <sup>b</sup>       | LSO <sup>c</sup> | AEP <sup>d</sup> | LOO <sup>b</sup> | LSO <sup>c</sup> | AEP <sup>d</sup> | LOO   | LSO   | AEP <sup>d</sup> |
| <b>6A93</b> | 8.16            | 9.41                   | 9.34             | 1.22             | 9.35             | 9.06             | 1.05             | 9.96  | 9.63  | 1.64             |
| <b>6A94</b> | 7.40            | 8.34                   | 6.12             | 1.11             | 8.85             | 6.06             | 1.40             | 8.12  | 6.54  | 0.79             |
| <b>6WGT</b> | 8.63            | 7.76                   | 6.43             | 1.54             | 7.45             | 7.26             | 1.28             | 7.52  | 7.12  | 1.31             |
| <b>6WH4</b> | 9.70            | 8.32                   | 8.11             | 1.49             | 8.36             | 8.24             | 1.40             | 8.75  | 8.54  | 1.06             |
| <b>6WHA</b> | 9.08            | 10.43                  | 10.23            | 1.25             | 10.87            | 10.15            | 1.43             | 10.13 | 10.77 | 1.37             |
| <b>7RAN</b> | NA <sup>e</sup> | 8.65                   | 7.42             | NA               | 8.65             | 7.18             | NA               | 8.31  | 7.89  | NA               |
| <b>7VOD</b> | 7.73            | 6.75                   | 5.22             | 1.75             | 6.87             | 5.56             | 1.52             | 6.97  | 5.85  | 1.32             |
| <b>7VOE</b> | 8.47            | 10.64                  | 9.61             | 1.66             | 10.88            | 10.14            | 2.04             | 10.12 | 10.26 | 1.72             |
| <b>7WC4</b> | 7.49            | 5.76                   | 4.59             | 2.32             | 5.95             | 5.53             | 1.75             | 5.24  | 5.02  | 2.36             |
| <b>7WC5</b> | NA              | 6.32                   | 5.11             | NA               | 6.23             | 5.12             | NA               | 5.87  | 5.46  | NA               |
| <b>7WC6</b> | 8.63            | 7.83                   | 6.32             | 1.56             | 7.98             | 7.45             | 0.92             | 7.46  | 7.12  | 1.34             |
| <b>7WC7</b> | 8.55            | 7.54                   | 7.32             | 1.12             | 7.75             | 7.62             | 0.87             | 7.34  | 7.09  | 1.34             |
| <b>7WC8</b> | 9.27            | 8.54                   | 7.64             | 1.18             | 8.92             | 8.12             | 0.75             | 8.14  | 8.03  | 1.19             |
| <b>7WC9</b> | NA              | 6.65                   | 7.36             | NA               | 6.65             | 8.47             | NA               | 6.28  | 8.28  | NA               |

<sup>a</sup>Predictions were obtained with FFD-optimized models. <sup>b</sup>Leave-one-out cross-validation. <sup>c</sup>Leave-some-out cross-validation with 5-random-groups-out. <sup>d</sup>The absolute error of prediction of LOO and LSO cross-validations. <sup>e</sup>Not available.

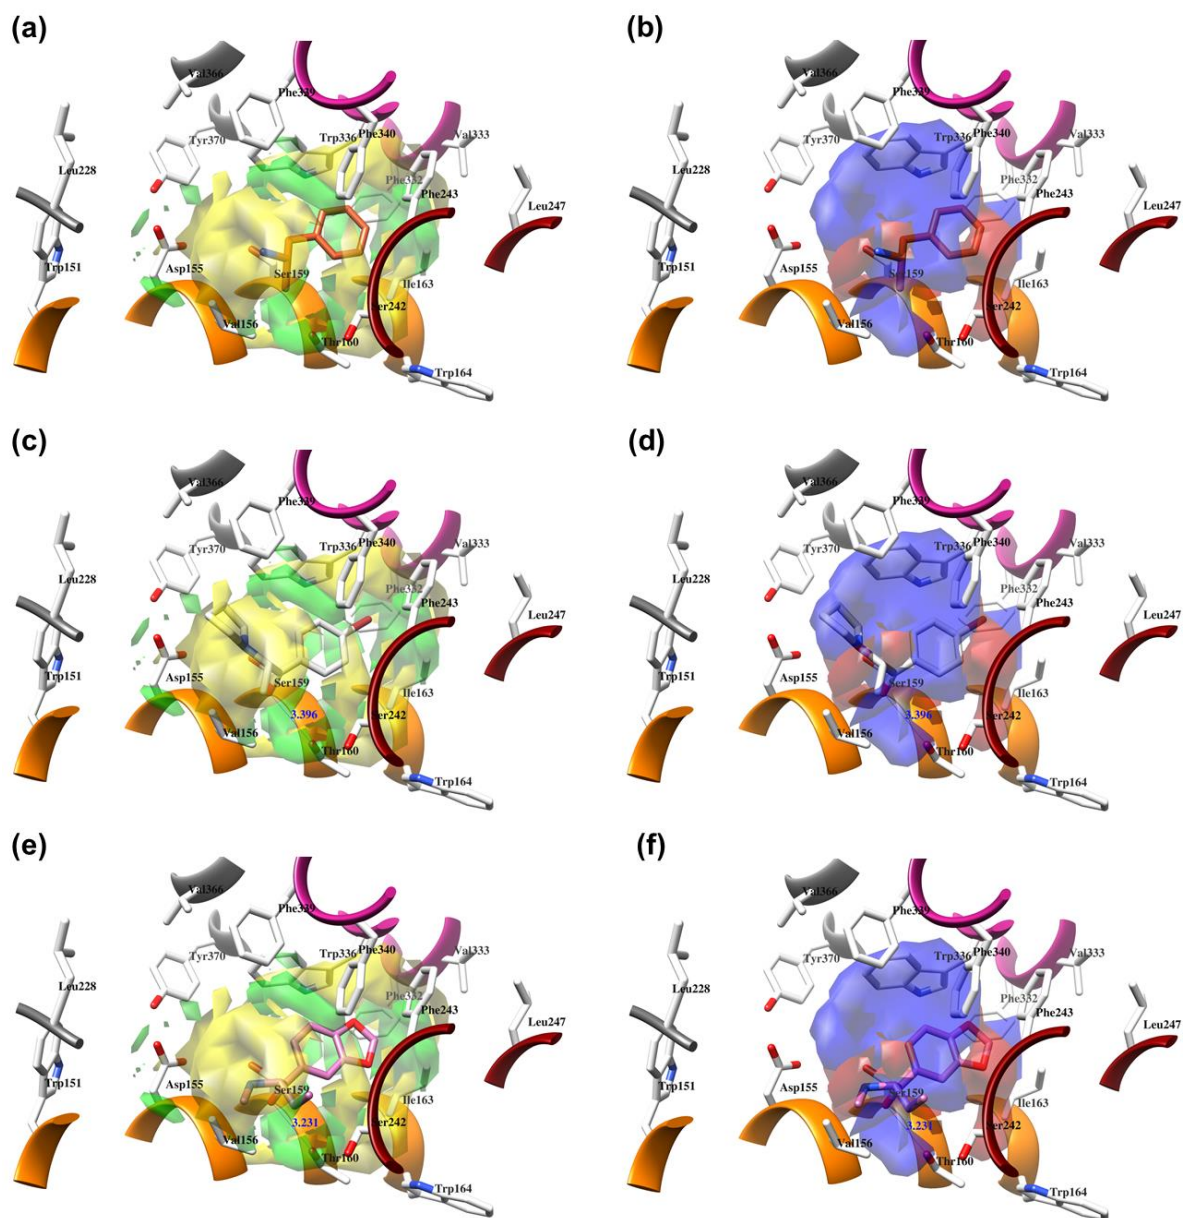

**Figure S1.** The structure-based alignment within 5-HT<sub>2A</sub>R-DPPC and OH2 probe-based *PLS-coefficients* (positive steric coefficients presented in green, negative steric coefficients depicted in yellow, positive electrostatic coefficients portrayed in red, negative electrostatic coefficients displayed in blue) for **23** (a, b); **11** (c, d); **19** (e, f). For the clarity of presentation, DPPC was omitted.

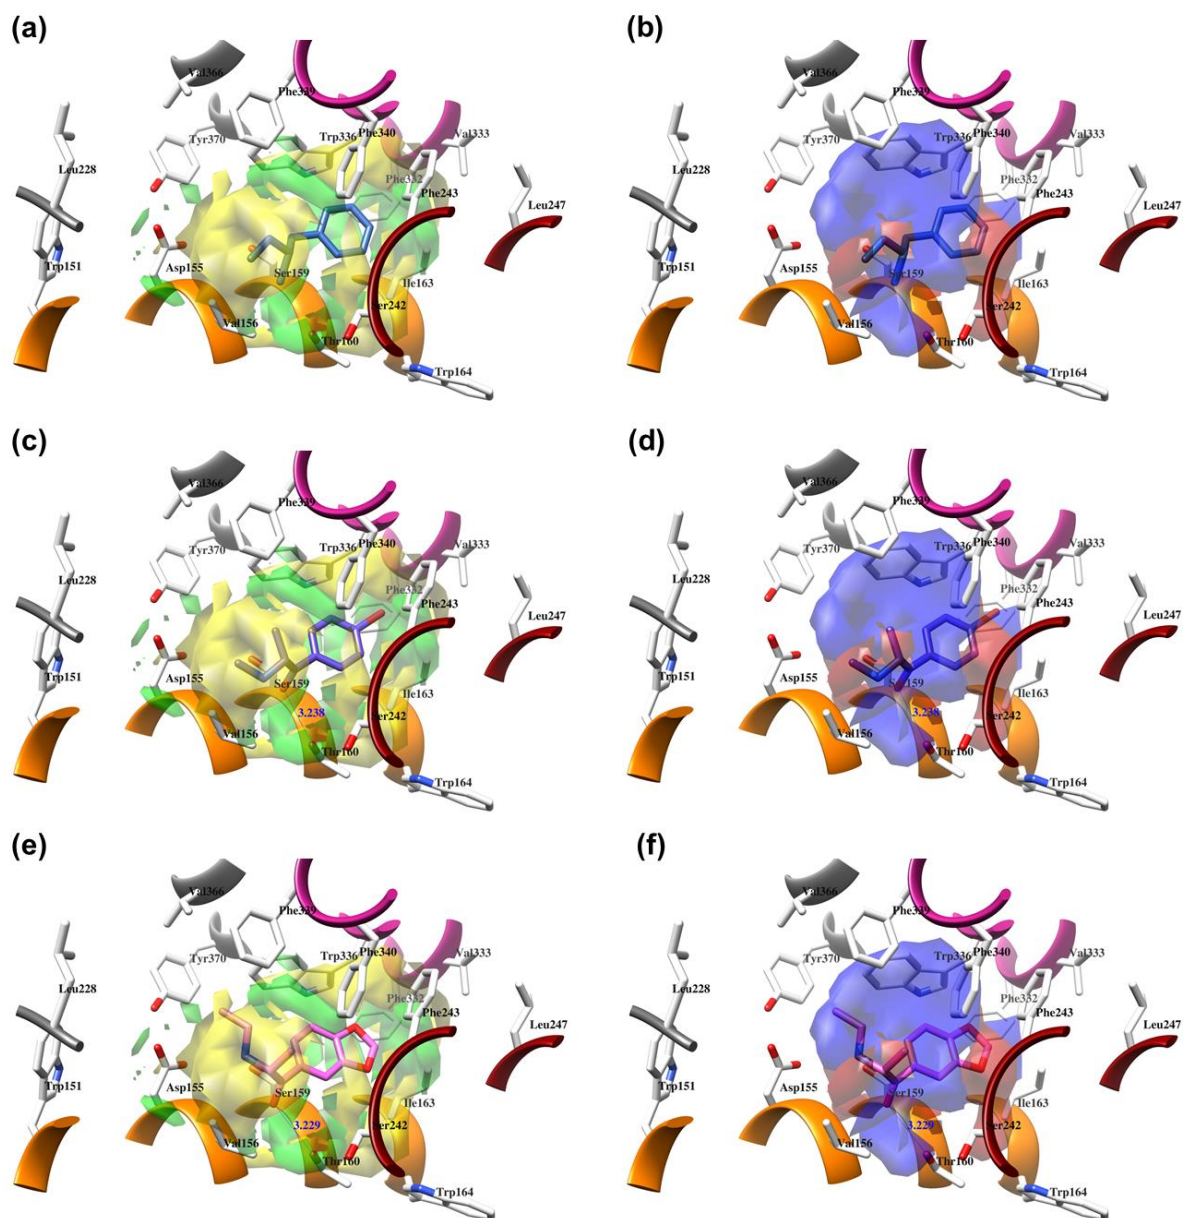

**Figure S2.** The structure-based alignment within 5-HT<sub>2A</sub>R-DPPC and OH2 probe-based *PLS-coefficients* (positive steric coefficients presented in green, negative steric coefficients depicted in yellow, positive electrostatic coefficients portrayed in red, negative electrostatic coefficients displayed in blue) for **24** (a, b); **5** (c, d); **20** (e, f). For the clarity of presentation, DPPC was omitted.

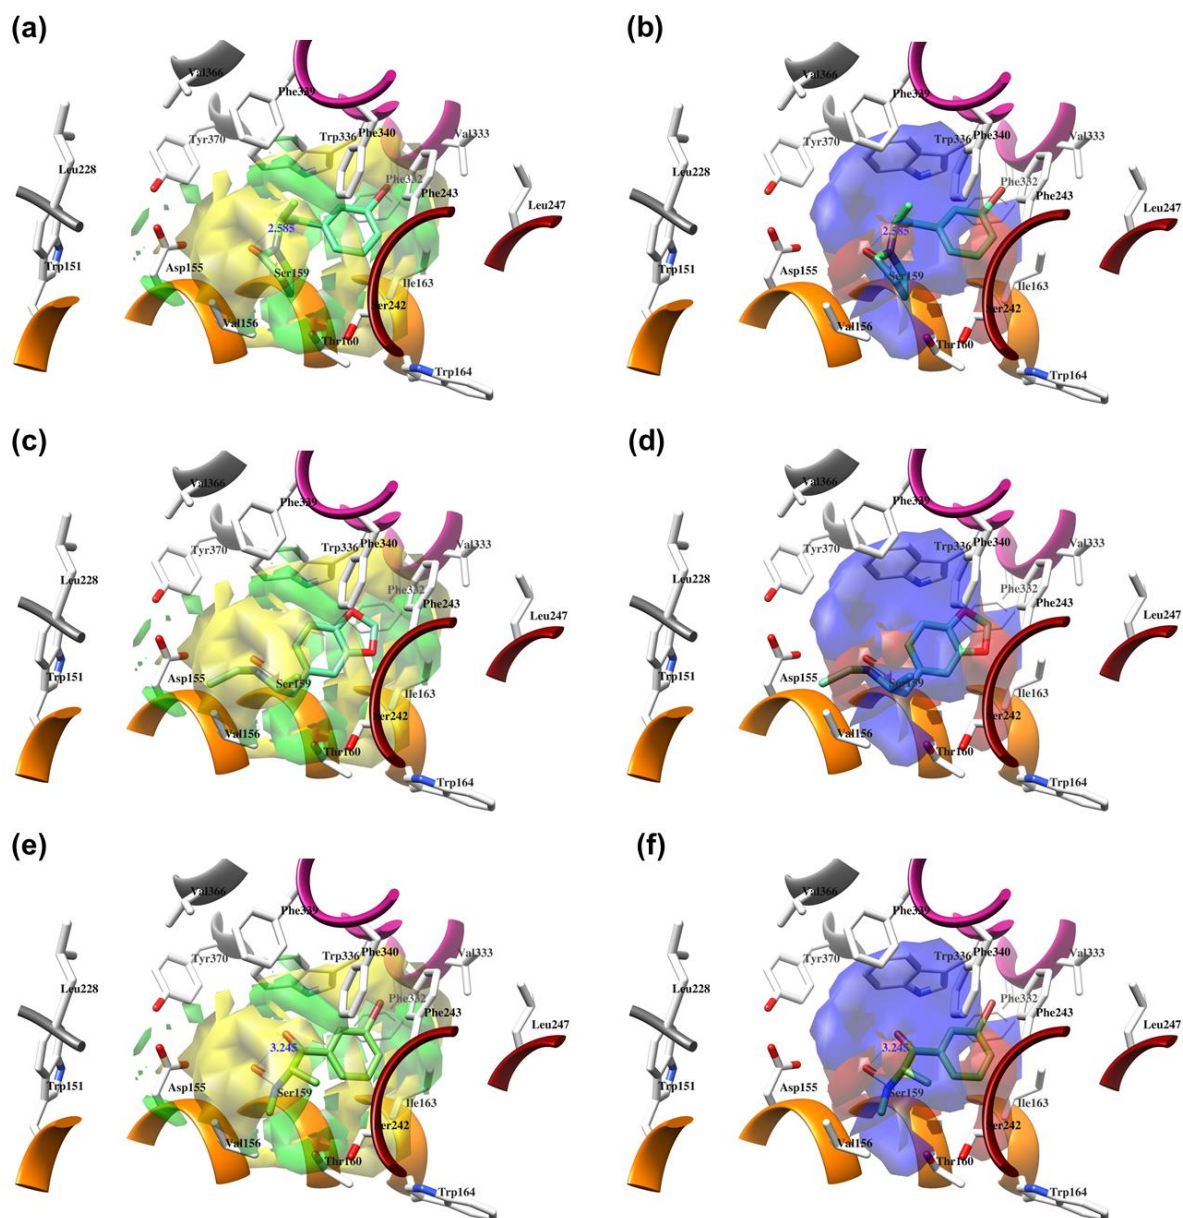

**Figure S3.** The structure-based alignment within 5-HT<sub>2A</sub>R-DPPC and OH2 probe-based *PLS-coefficients* (positive steric coefficients presented in green, negative steric coefficients depicted in yellow, positive electrostatic coefficients portrayed in red, negative electrostatic coefficients displayed in blue) for **12** (a, b); **21** (c, d); **6** (e, f). For the clarity of presentation, DPPC was omitted.



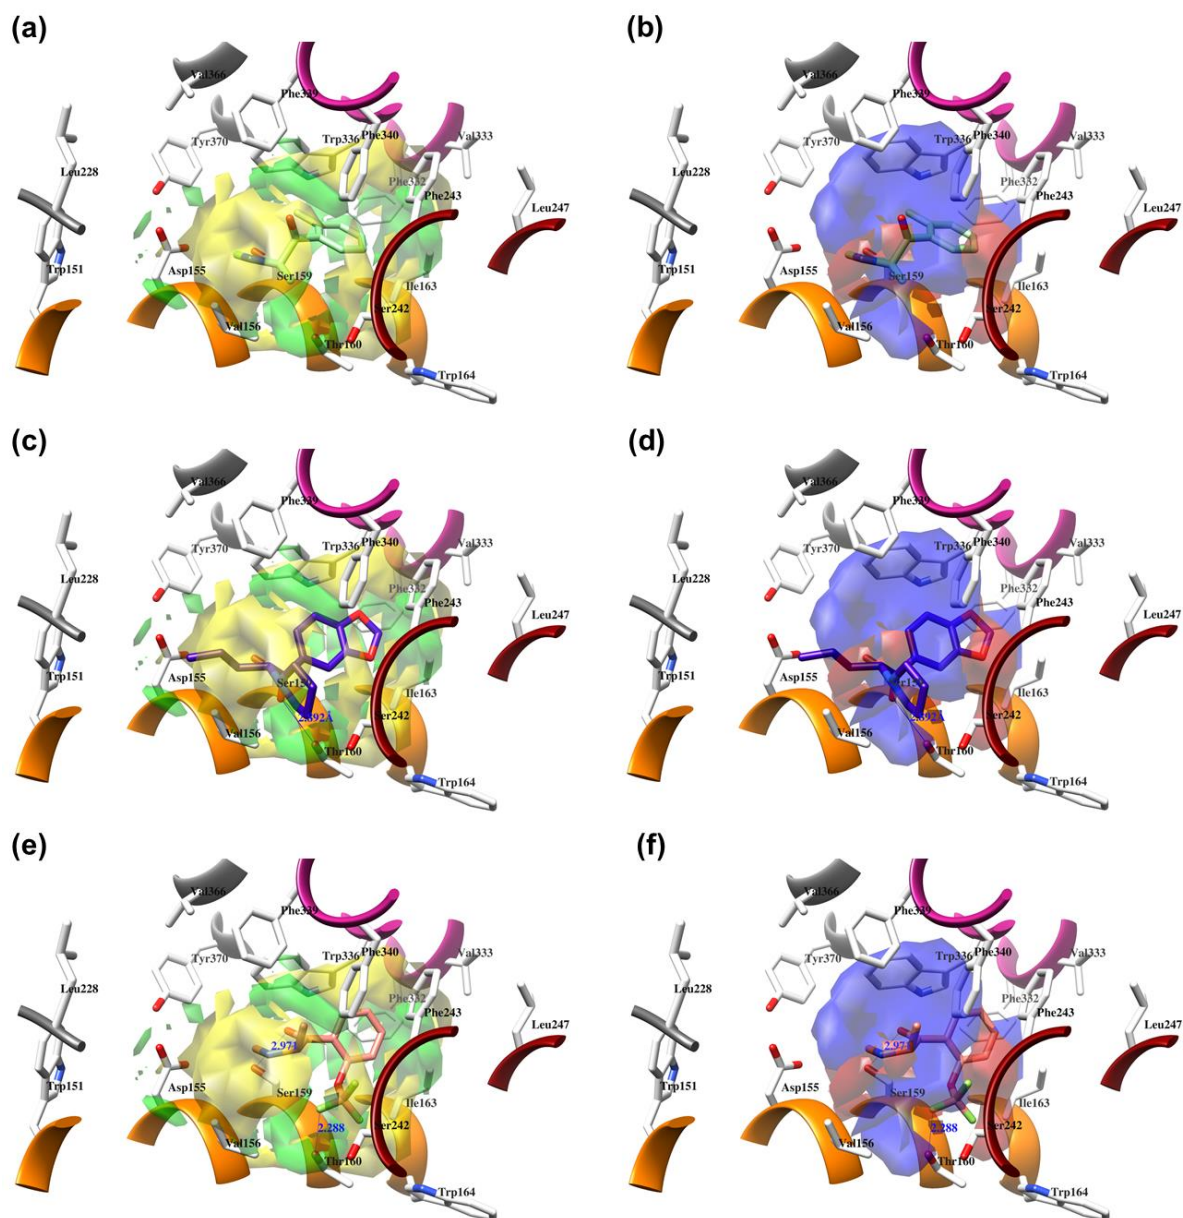

**Figure S4.** The structure-based alignment within 5-HT<sub>2A</sub>AR-DPPC and OH2 probe-based *PLS-coefficients* (positive steric coefficients presented in green, negative steric coefficients depicted in yellow, positive electrostatic coefficients portrayed in red, negative electrostatic coefficients displayed in blue) for **7**(a, b); **14** (c, d); **8** (e, f). For the clarity of presentation, DPPC was omitted.

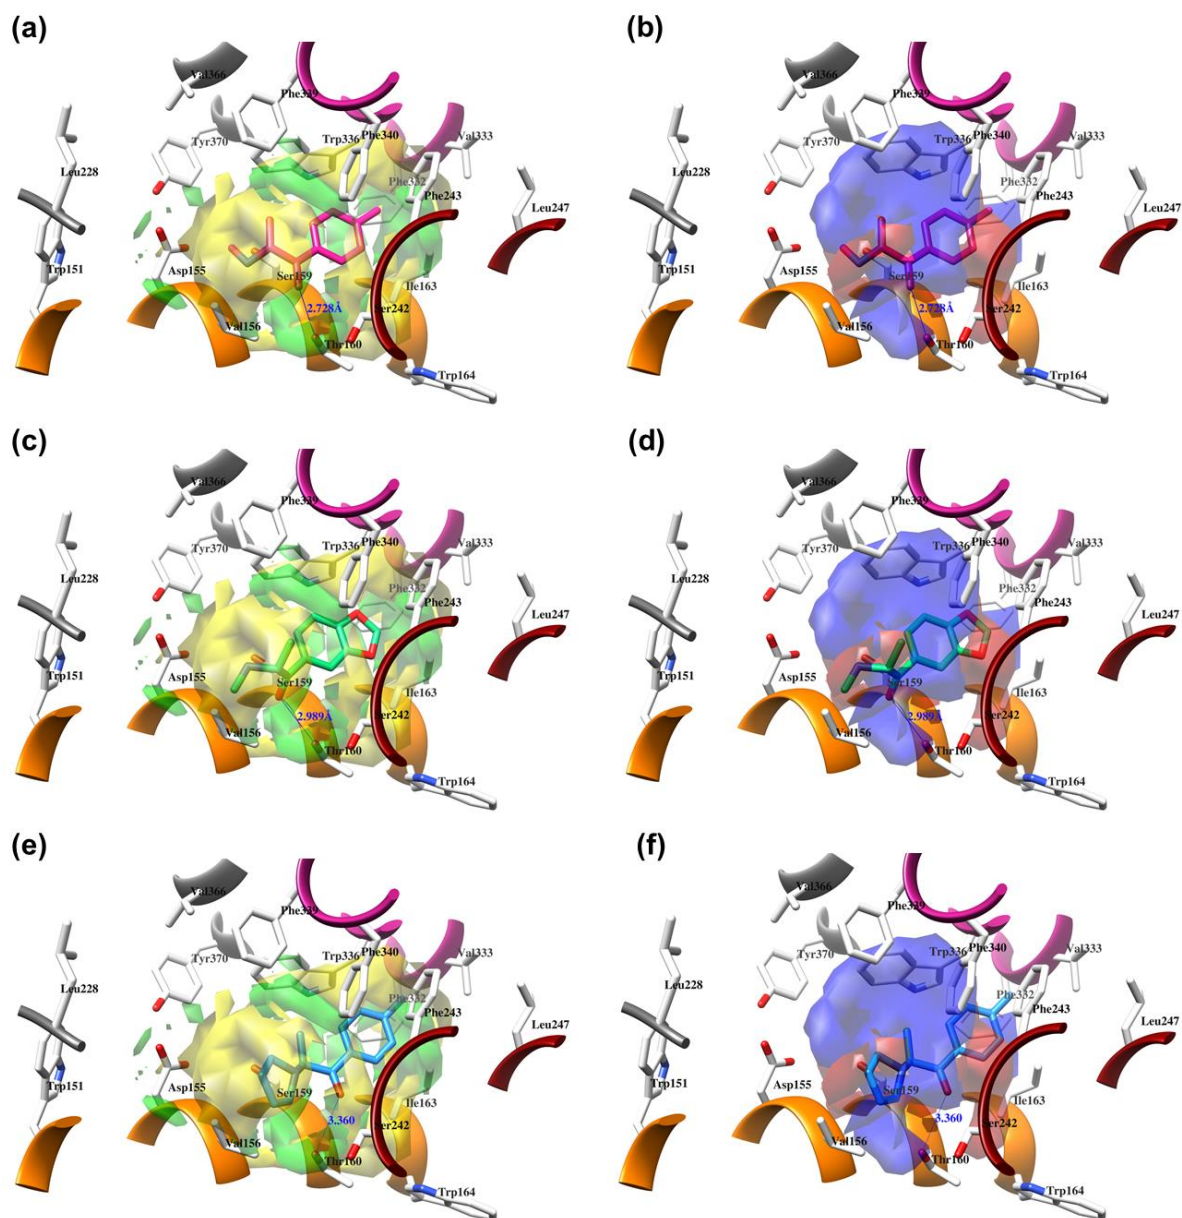

**Figure S5.** The structure-based alignment within 5-HT<sub>2A</sub>AR-DPPC and OH2 probe-based *PLS-coefficients* (positive steric coefficients presented in green, negative steric coefficients depicted in yellow, positive electrostatic coefficients portrayed in red, negative electrostatic coefficients displayed in blue) for **3** (a, b); **22** (c, d); **10** (e, f). For the clarity of presentation, DPPC was omitted.

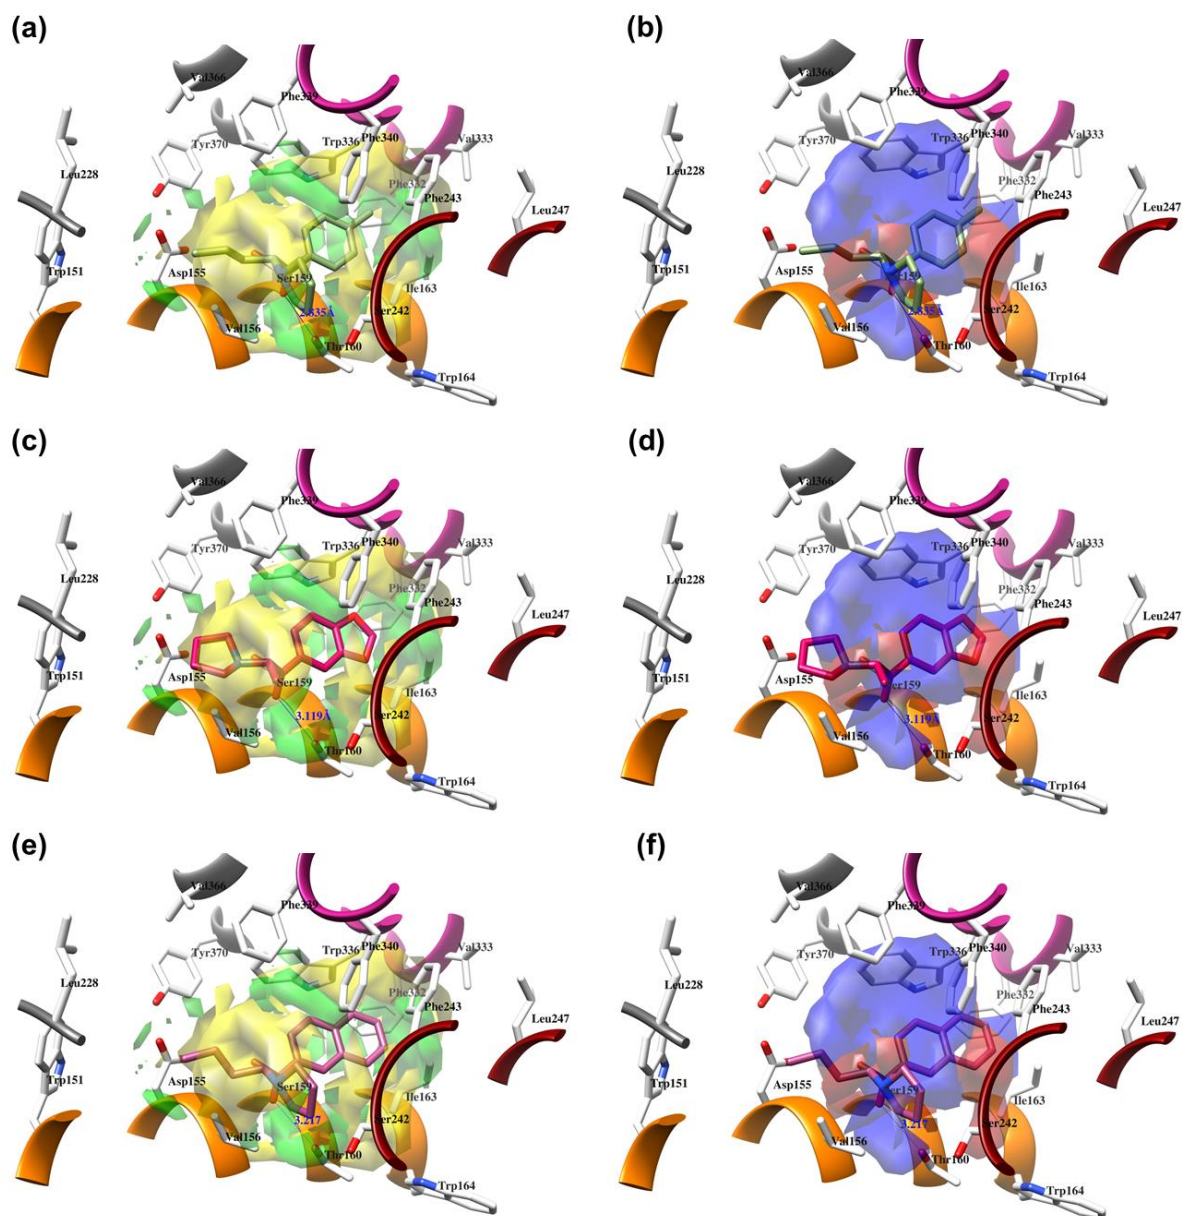

**Figure S6.** The structure-based alignment within 5-HT<sub>2A</sub>AR-DPPC and OH2 probe-based *PLS-coefficients* (positive steric coefficients presented in green, negative steric coefficients depicted in yellow, positive electrostatic coefficients portrayed in red, negative electrostatic coefficients displayed in blue) for **15** (a, b); **16** (c, d); **13**(e, f). For the clarity of presentation, DPPC was omitted.



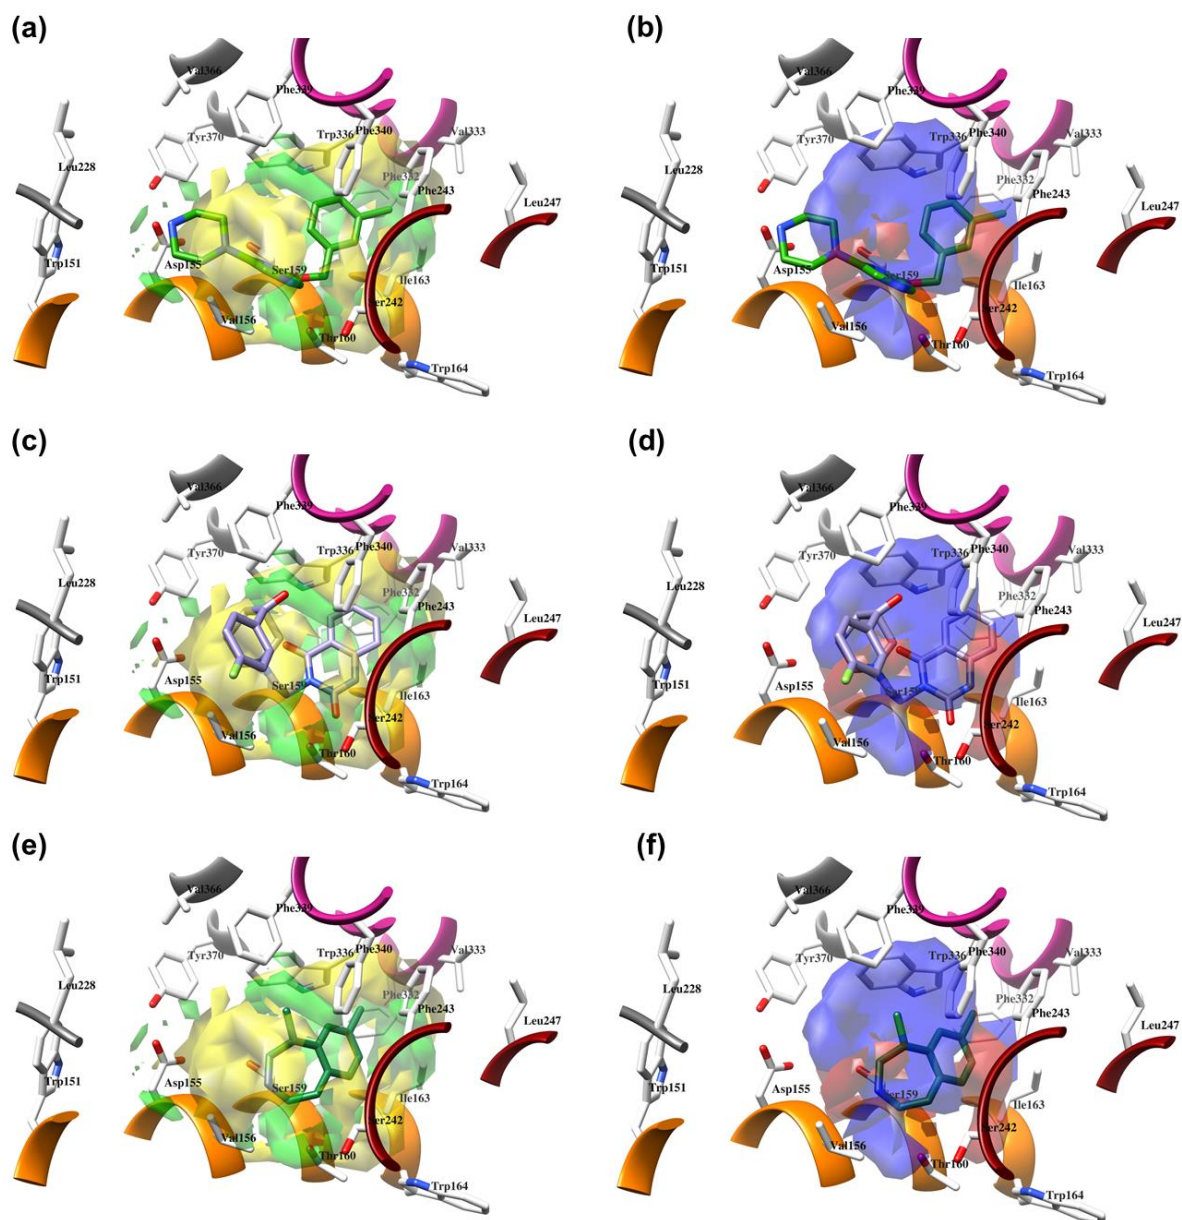

**Figure S7.** The structure-based alignment within 5-HT<sub>2A</sub>AR-DPPC and OH2 probe-based *PLS-coefficients* (positive steric coefficients presented in green, negative steric coefficients depicted in yellow, positive electrostatic coefficients portrayed in red, negative electrostatic coefficients displayed in blue) for **28** (a, b); **29** (c, d); **30** (e, f). For the clarity of presentation, DPPC was omitted.



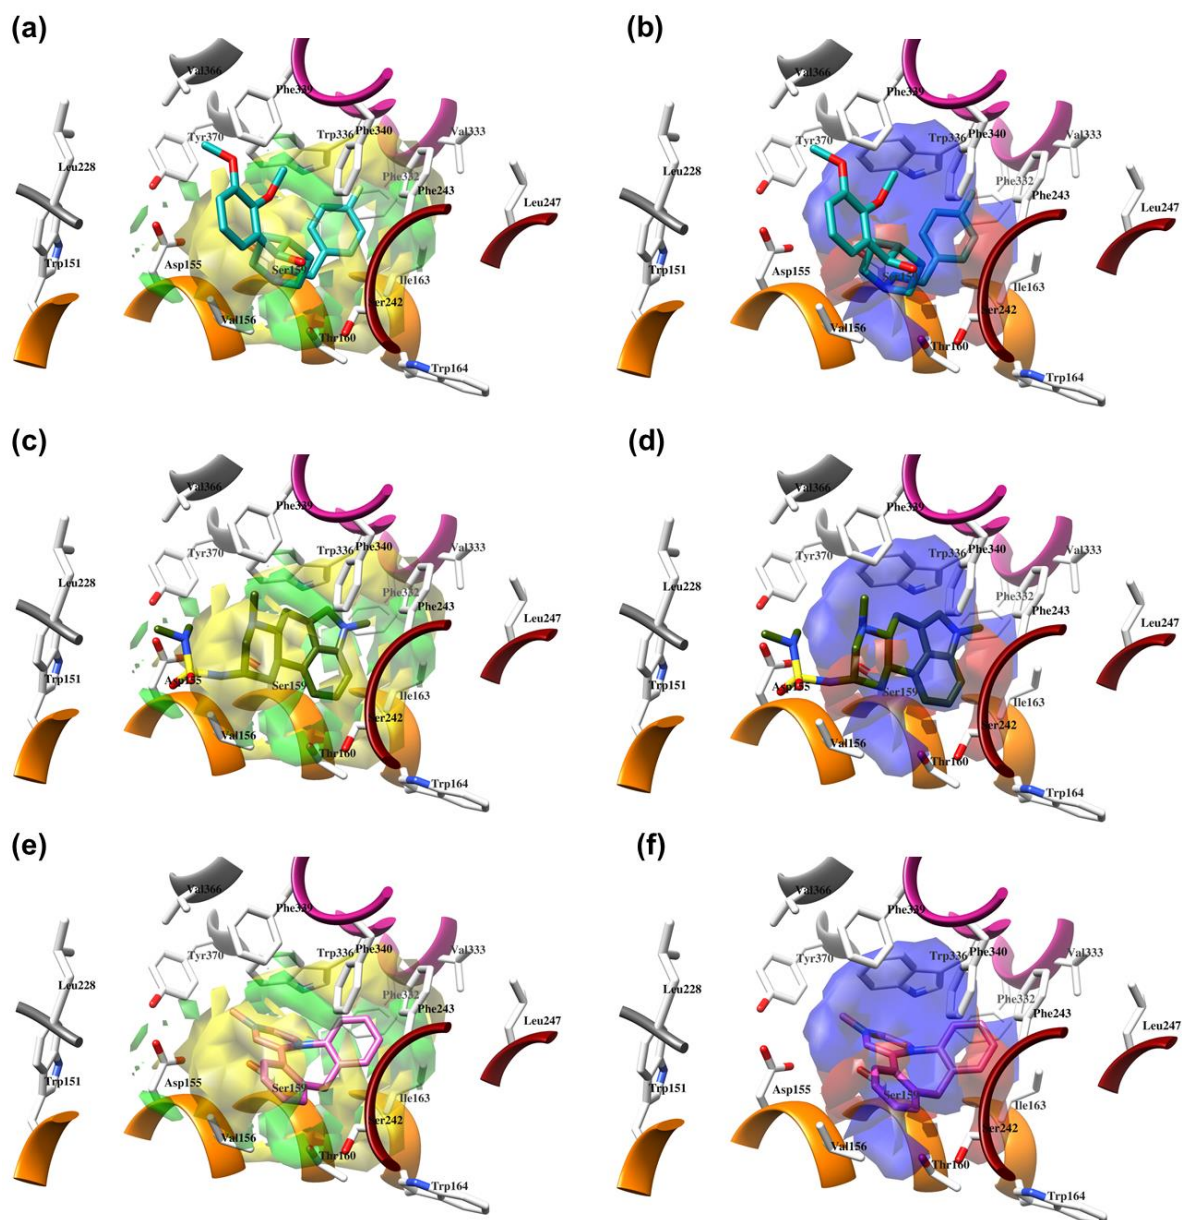

**Figure S8.** The structure-based alignment within 5-HT<sub>2A</sub>R-DPPC and OH2 probe-based *PLS-coefficients* (positive steric coefficients presented in green, negative steric coefficients depicted in yellow, positive electrostatic coefficients portrayed in red, negative electrostatic coefficients displayed in blue) for **31**(a, b); **32** (c, d); **33** (e, f). For the clarity of presentation, DPPC was omitted.

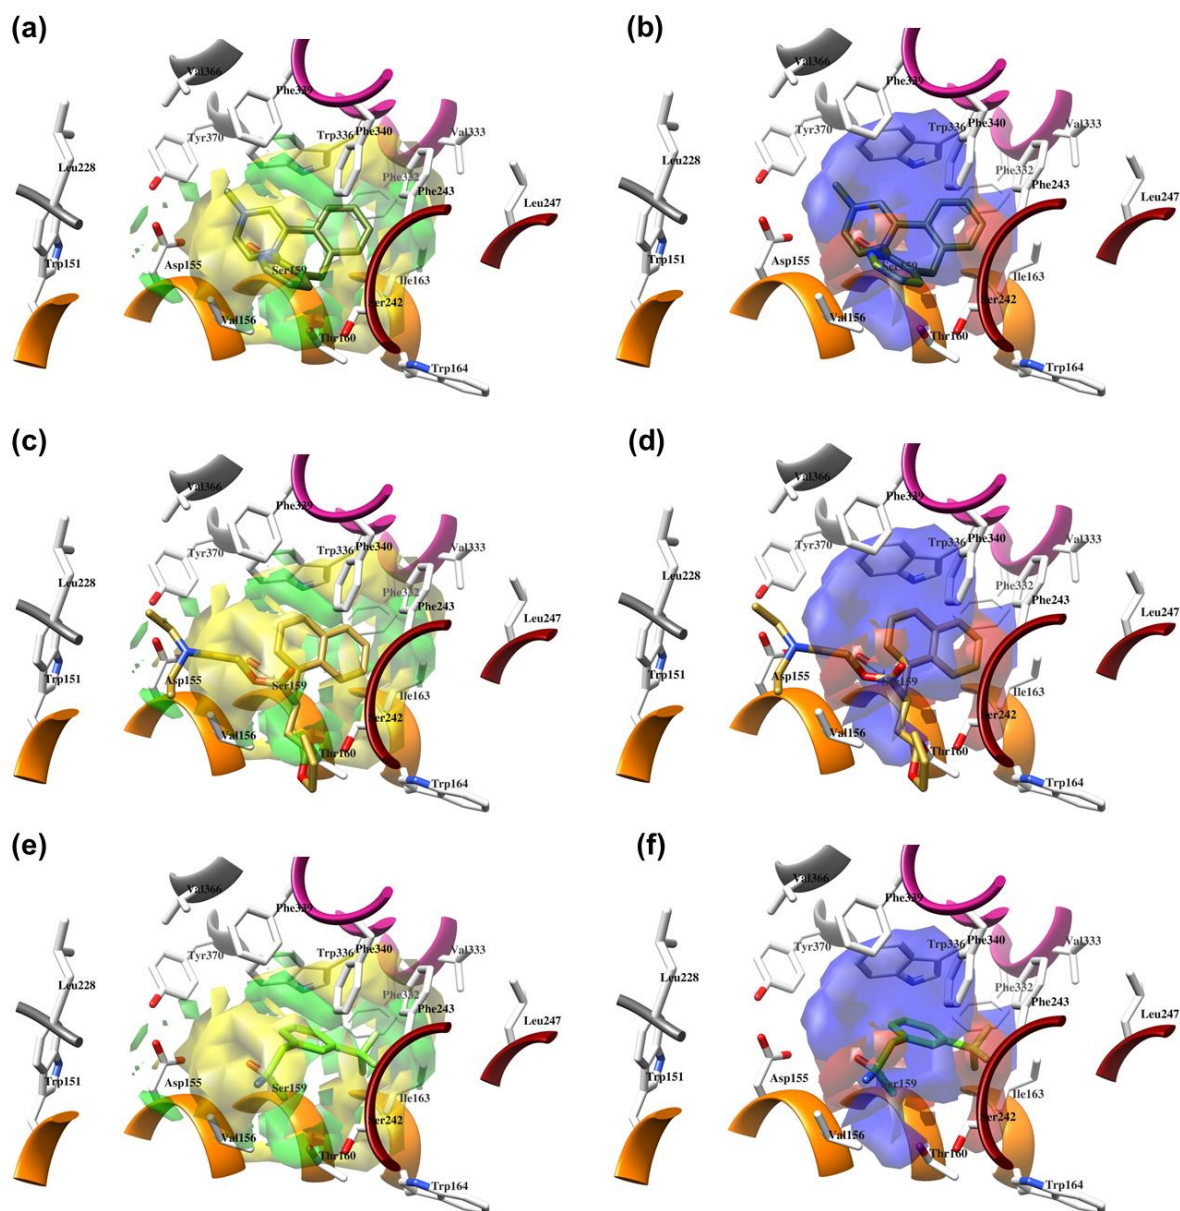

**Figure S9.** The structure-based alignment within 5-HT<sub>2A</sub>R-DPPC and OH2 probe-based *PLS-coefficients* (positive steric coefficients presented in green, negative steric coefficients depicted in yellow, positive electrostatic coefficients portrayed in red, negative electrostatic coefficients displayed in blue) for **34** (a, b); **35** (c, d); **36** (e, f). For the clarity of presentation, DPPC was omitted.

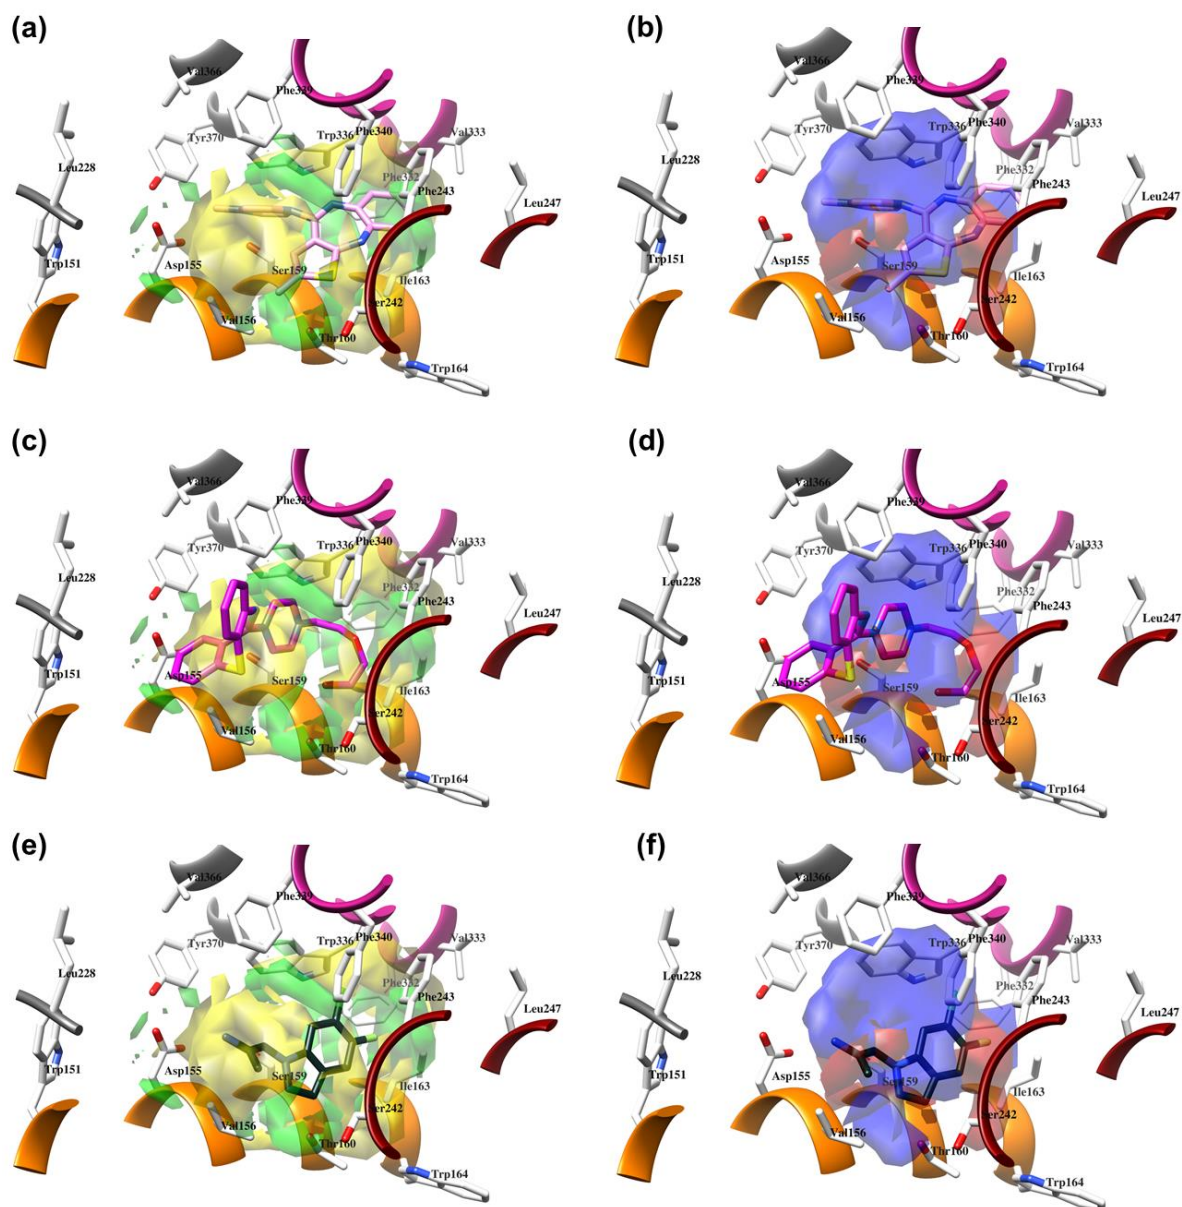

**Figure S10.** The structure-based alignment within 5-HT<sub>2A</sub>R-DPPC and OH2 probe-based *PLS-coefficients* (positive steric coefficients presented in green, negative steric coefficients depicted in yellow, positive electrostatic coefficients portrayed in red, negative electrostatic coefficients displayed in blue) for **37** (a, b); **38** (c, d); **39** (e, f). For the clarity of presentation, DPPC was omitted.



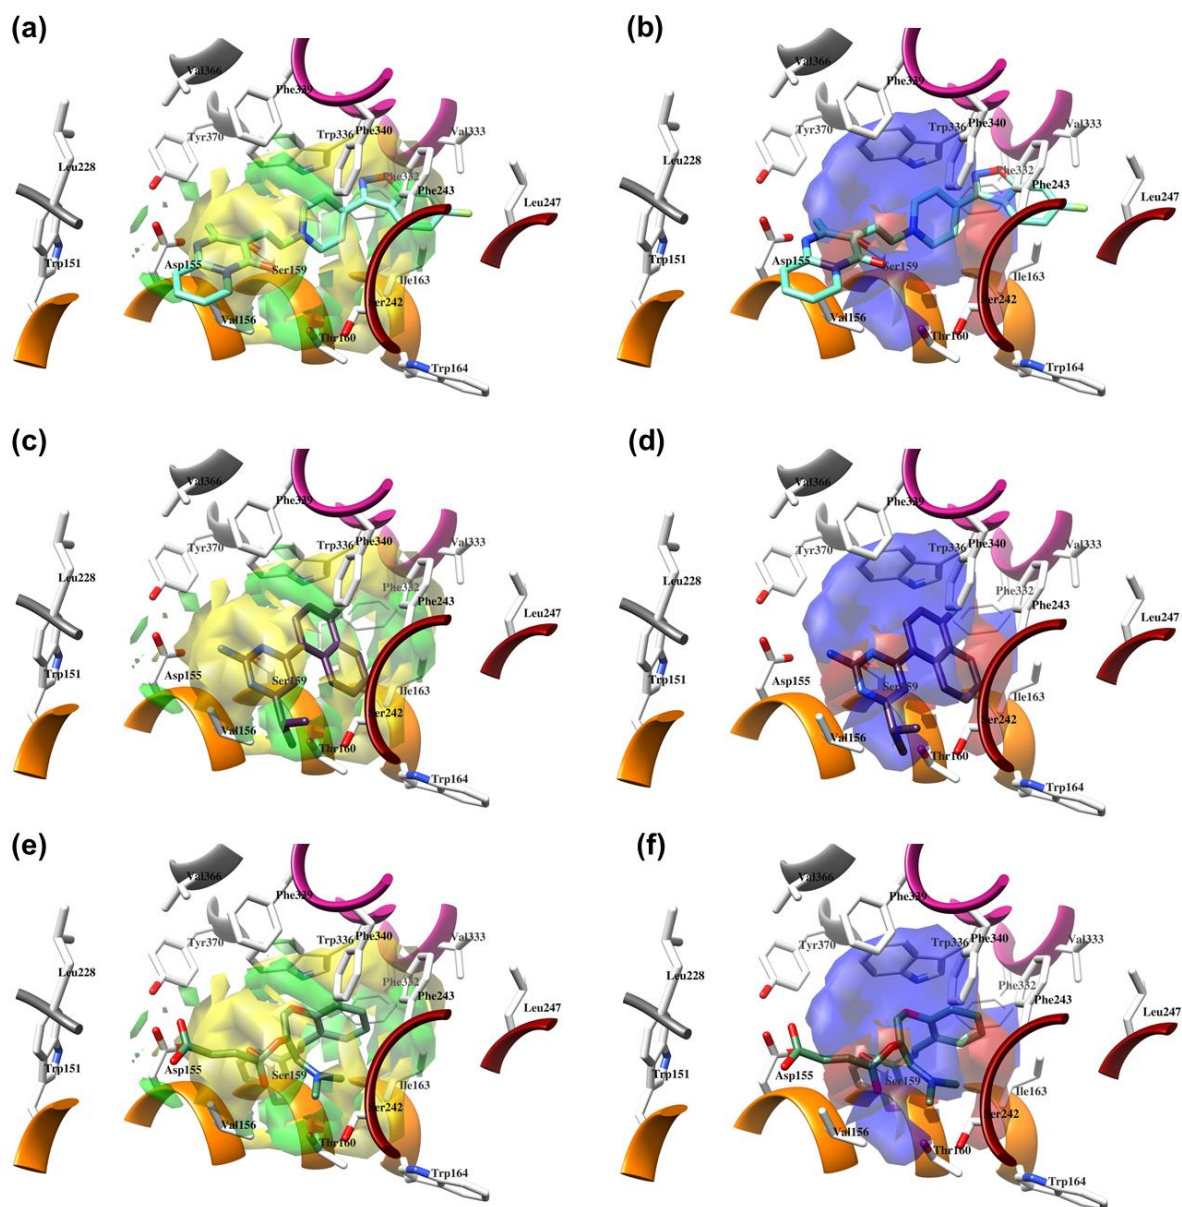

**Figure S11.** The structure-based alignment within 5-HT<sub>2A</sub>R-DPPC and OH2 probe-based *PLS-coefficients* (positive steric coefficients presented in green, negative steric coefficients depicted in yellow, positive electrostatic coefficients portrayed in red, negative electrostatic coefficients displayed in blue) for **40** (a, b); **41** (c, d); **42** (e, f). For the clarity of presentation, DPPC was omitted.

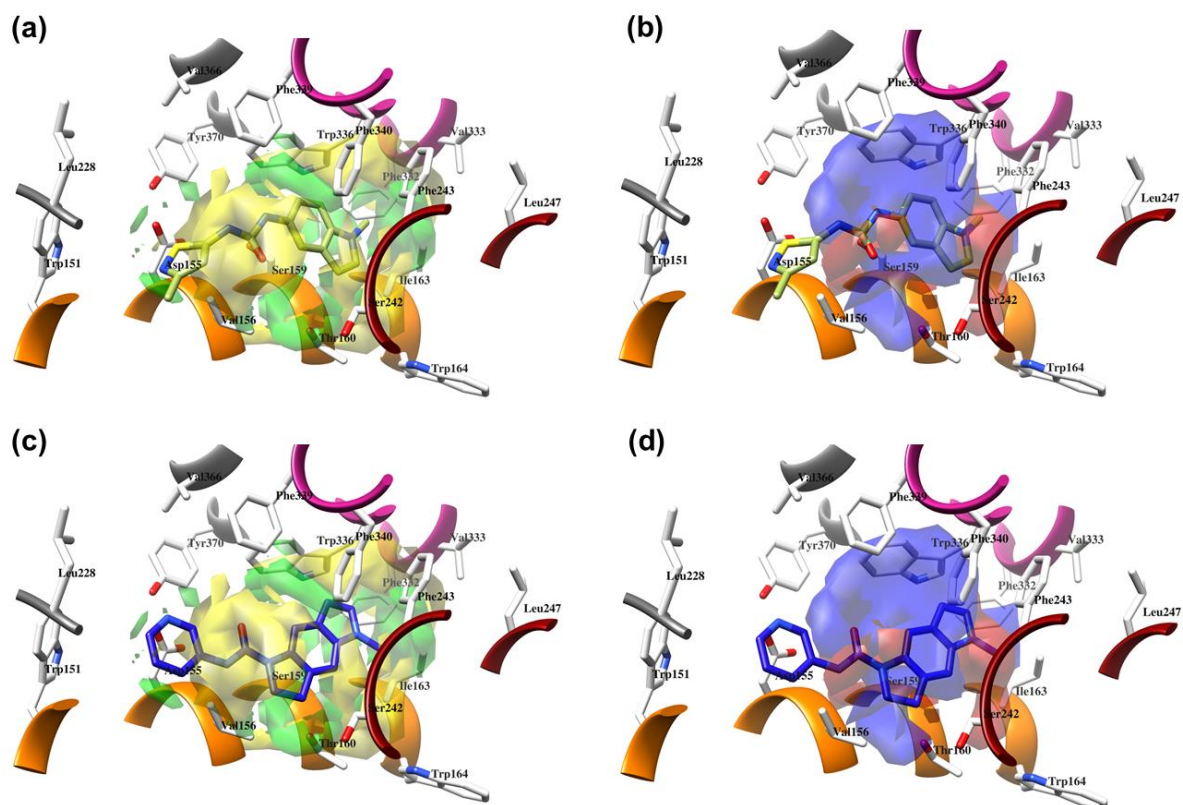

**Figure S12.** The structure-based alignment within 5-HT<sub>2A</sub>R-DPPC and OH2 probe-based *PLS-coefficients* (positive steric coefficients presented in green, negative steric coefficients depicted in yellow, positive electrostatic coefficients portrayed in red, negative electrostatic coefficients displayed in blue) for **43** (a, b); **44** (c, d). For the clarity of presentation, DPPC was omitted.

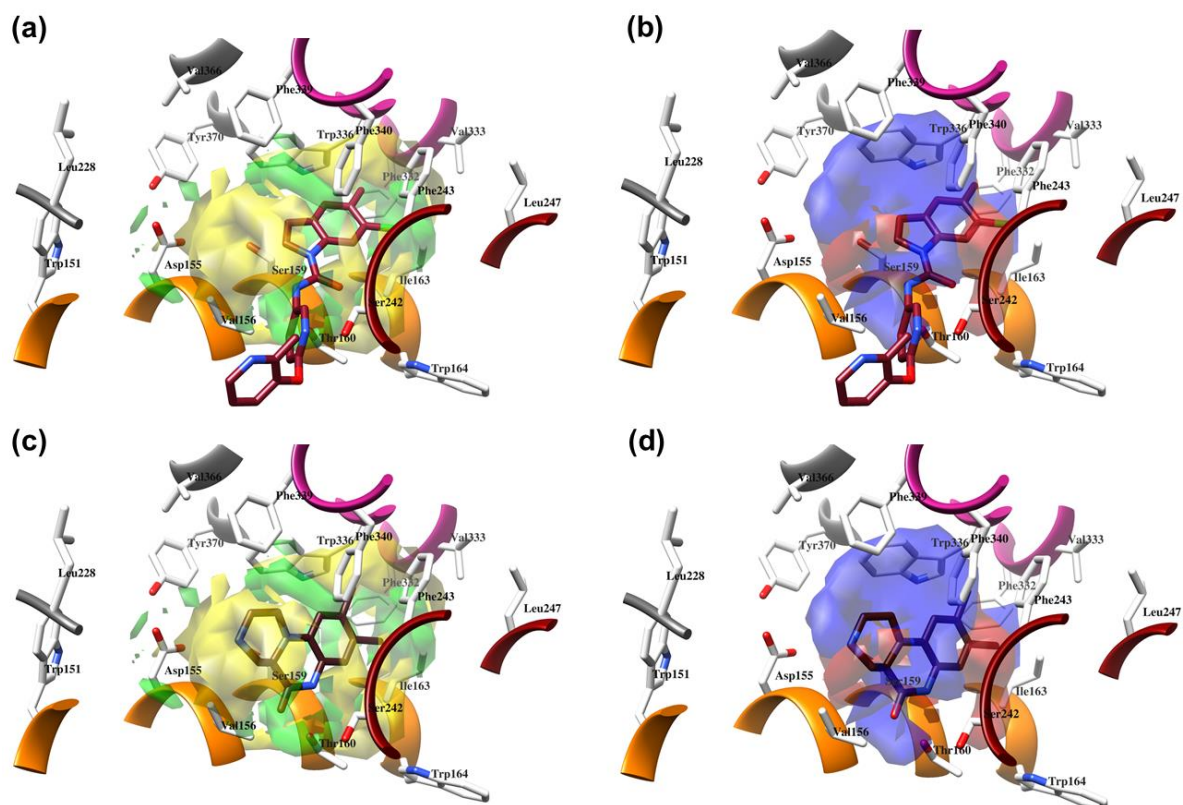

**Figure S13.** The structure-based alignment within 5-HT<sub>2A</sub>R-DPPC and OH2 probe-based *PLS-coefficients* (positive steric coefficients presented in green, negative steric coefficients depicted in yellow, positive electrostatic coefficients portrayed in red, negative electrostatic coefficients displayed in blue) for **45** (a, b); **46** (c, d). For the clarity of presentation, DPPC was omitted.



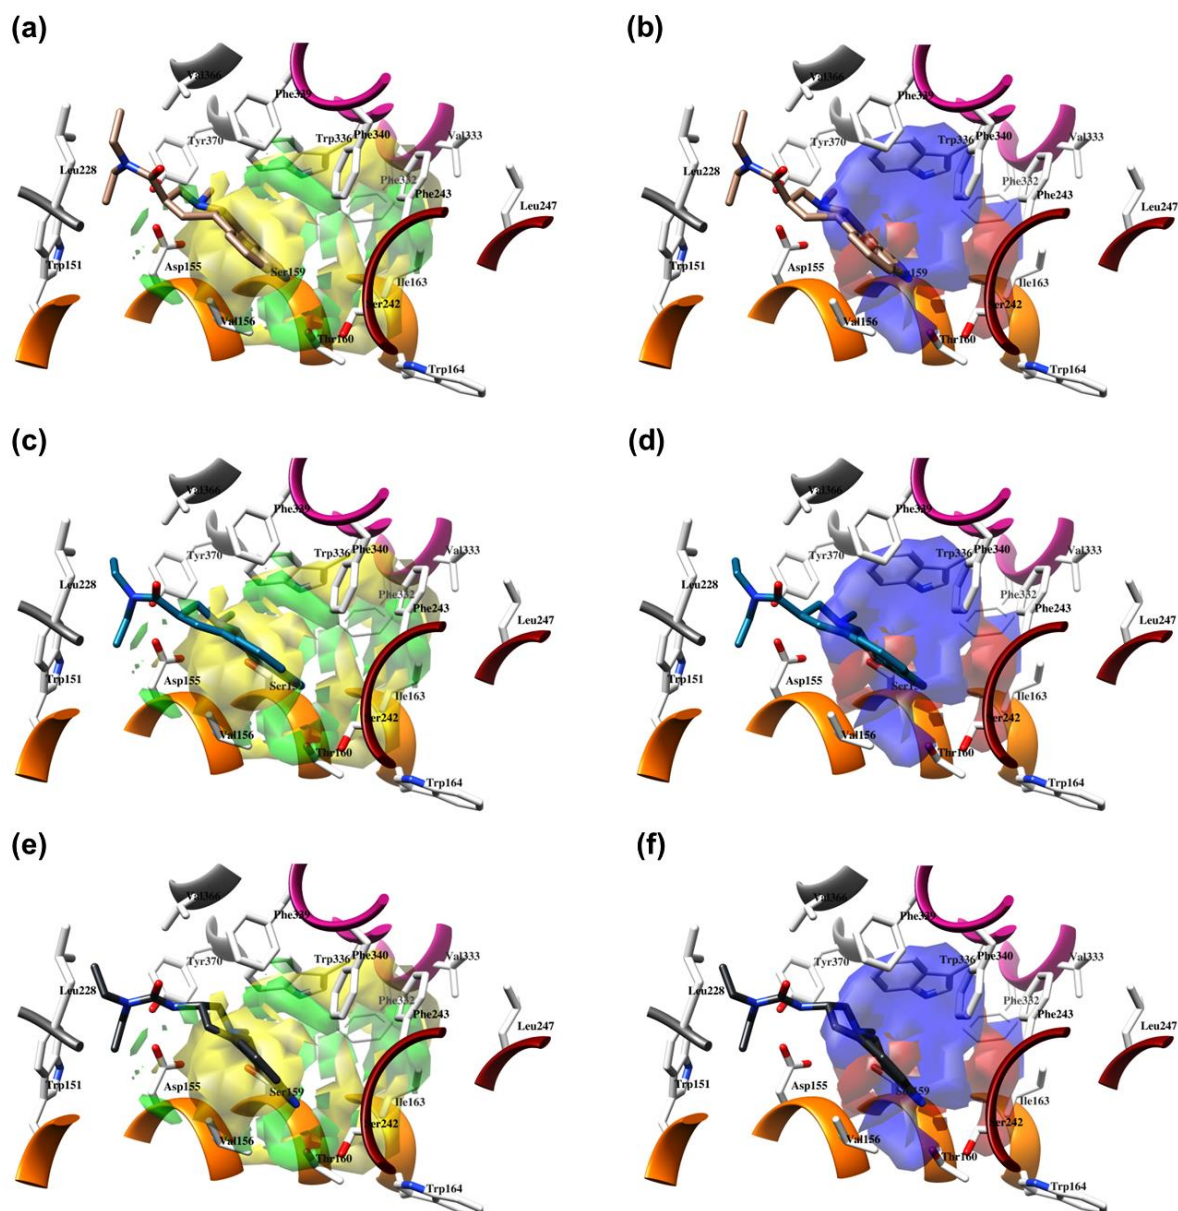

**Figure S14.** The structure-based alignment within 5-HT<sub>2A</sub>R-DPPC and OH2 probe-based *PLS-coefficients* (positive steric coefficients presented in green, negative steric coefficients depicted in yellow, positive electrostatic coefficients portrayed in red, negative electrostatic coefficients displayed in blue) for **6WGT** (a, b); **7WC6** (c, d); **7WC7** (e, f). For the clarity of presentation, DPPC was omitted.

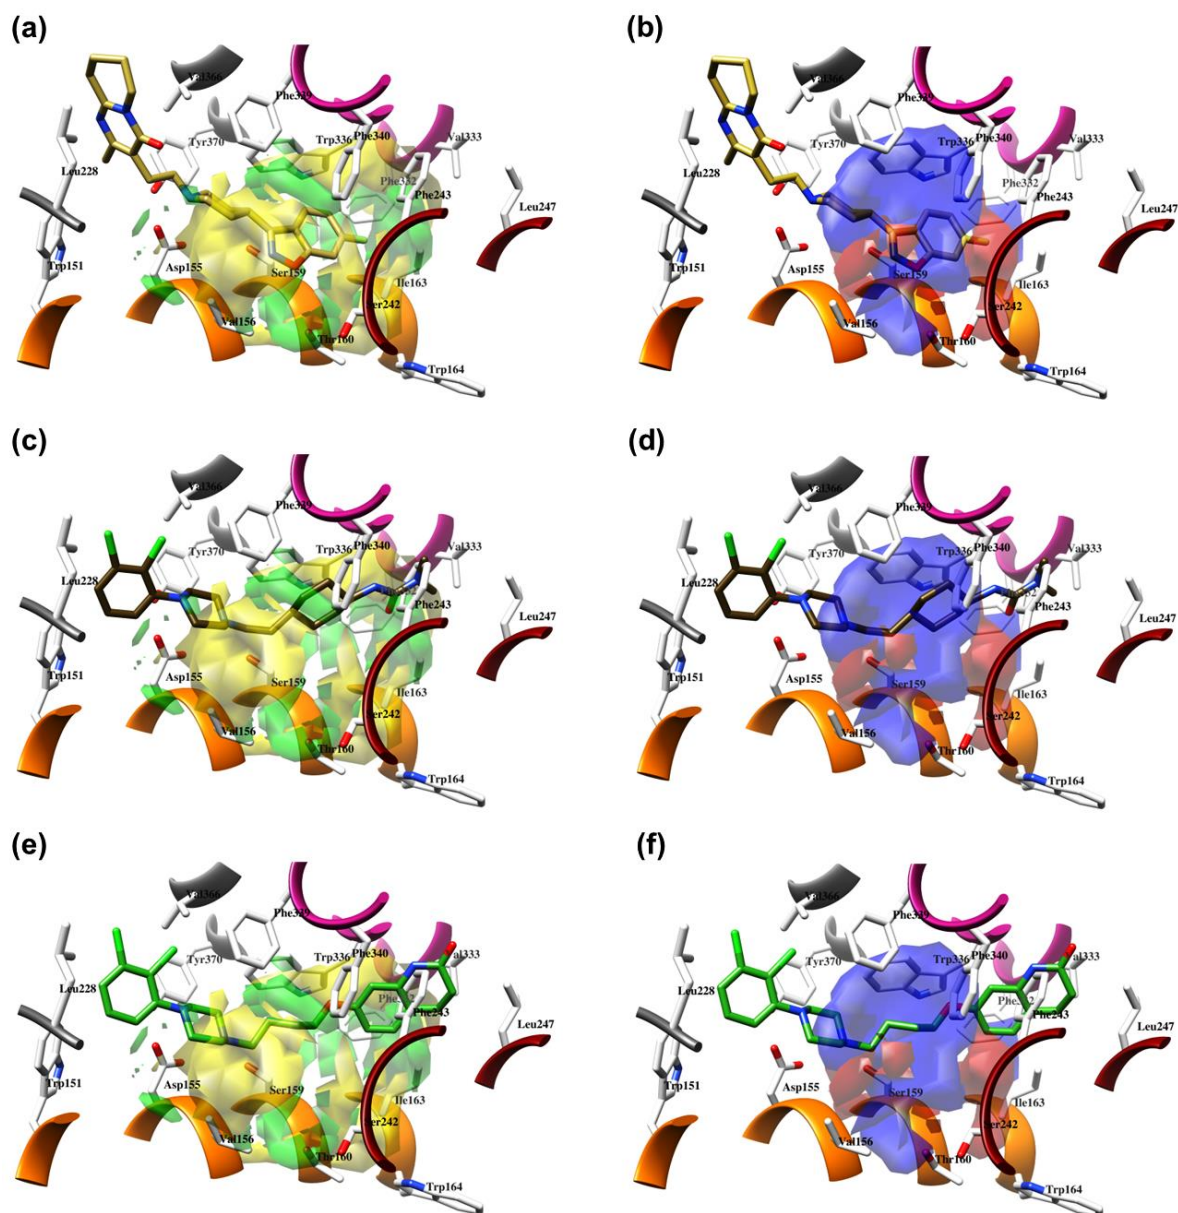

**Figure S15.** The structure-based alignment within 5-HT<sub>2A</sub>R-DPPC and OH2 probe-based *PLS-coefficients* (positive steric coefficients presented in green, negative steric coefficients depicted in yellow, positive electrostatic coefficients portrayed in red, negative electrostatic coefficients displayed in blue) for **6A93** (a, b); **7VOD** (c, d); **7VOE** (e, f). For the clarity of presentation, DPPC was omitted.



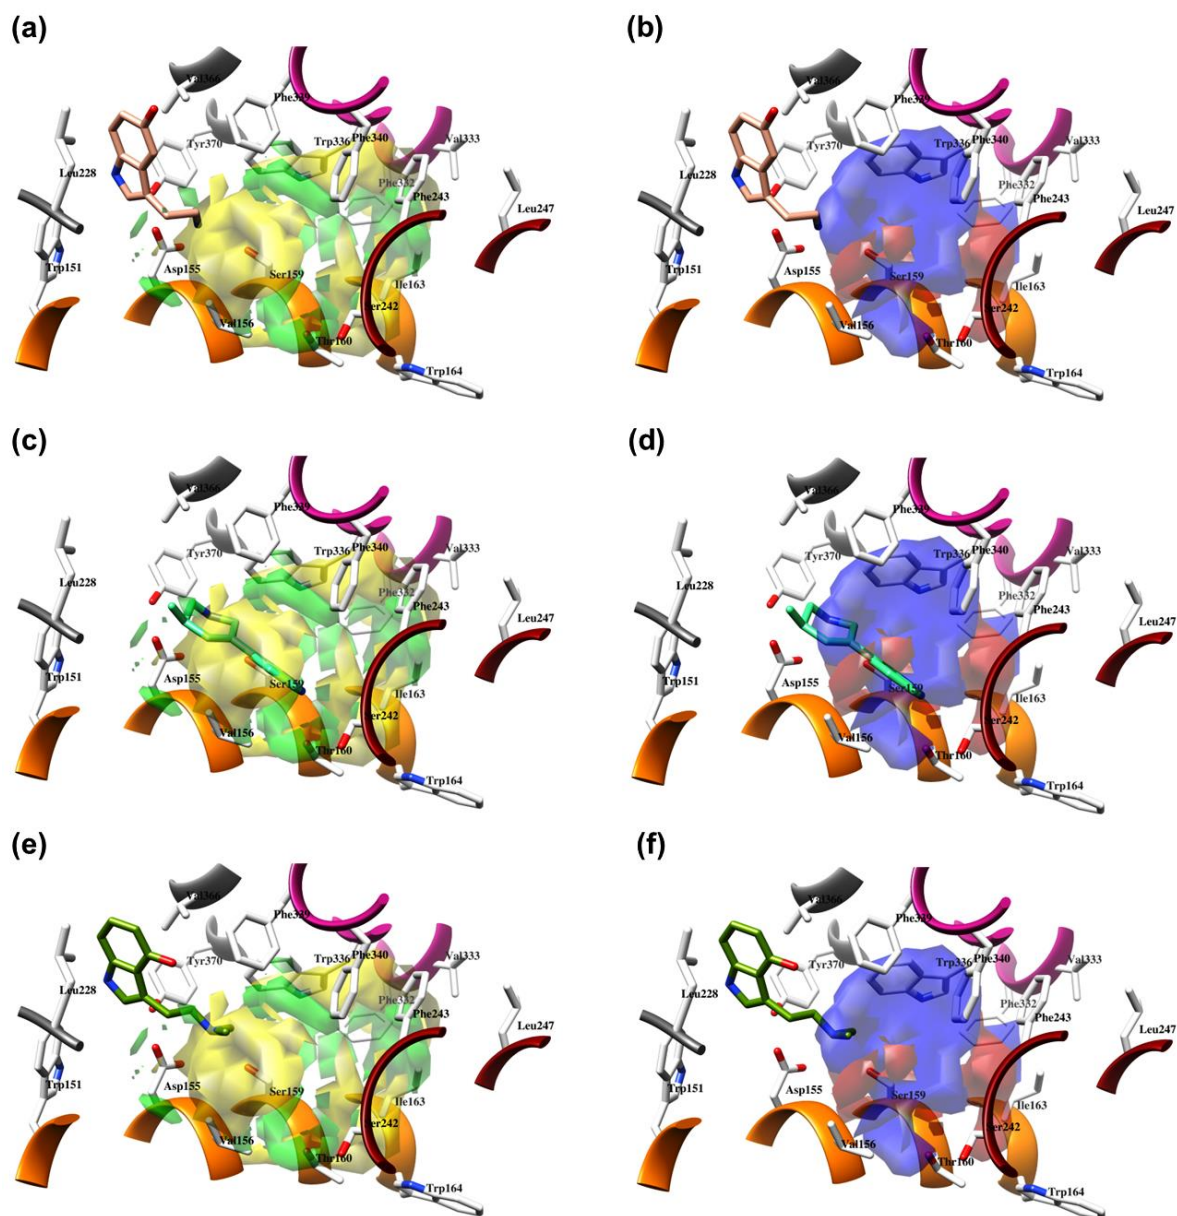

**Figure S16.** The structure-based alignment within 5-HT<sub>2A</sub>R-DPPC and OH2 probe-based *PLS-coefficients* (positive steric coefficients presented in green, negative steric coefficients depicted in yellow, positive electrostatic coefficients portrayed in red, negative electrostatic coefficients displayed in blue) for **7WC4** (a, b); **7RAN** (c, d); **7WC5** (e, f). For the clarity of presentation, DPPC was omitted.

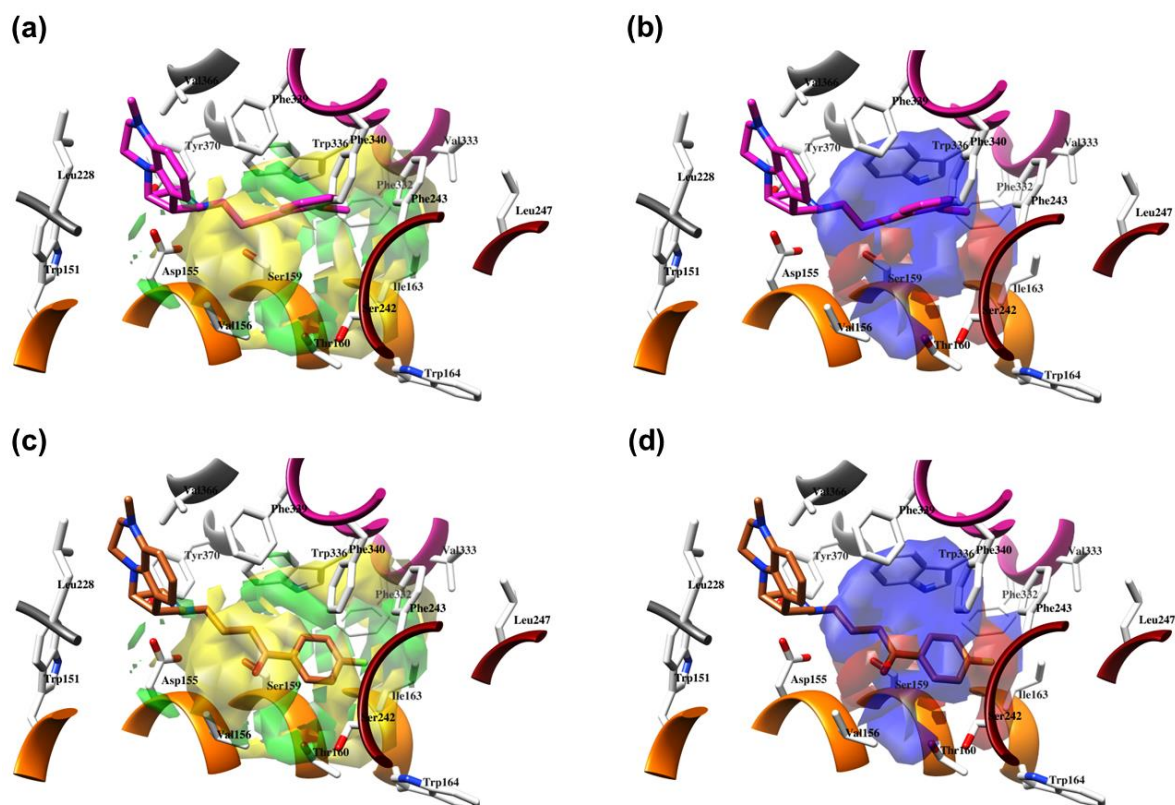

**Figure S17.** The structure-based alignment within 5-HT<sub>2A</sub>R-DPPC and OH2 probe-based *PLS-coefficients* (positive steric coefficients presented in green, negative steric coefficients depicted in yellow, positive electrostatic coefficients portrayed in red, negative electrostatic coefficients displayed in blue) for **7WC9** (a, b); **7WC8** (c, d). For the clarity of presentation, DPPC was omitted.
